# Supplementary material
Source: ML conference proceedings conference paper supplement (https://openreview.net/forum?id=f829mkQMUg)
Supplement: supplementary_material [file attachment]

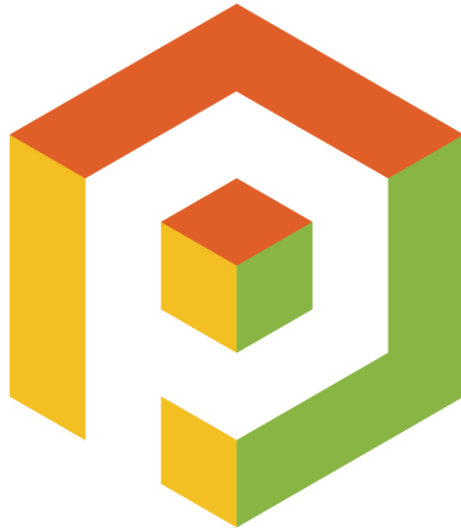

# PlatEMO

*Evolutionary Multi-Objective  
Optimization Platform*

User Manual 3.5

BIMK Group

April 23, 2022

Thank you very much for using PlatEMO. The copyright of PlatEMO belongs to the BIMK Group. This platform is only for research and educational purposes. The codes were implemented based on our understanding of the algorithms published in literatures. You should not rely upon the material or information provided by the platform as a basis for making any business, legal or any other decisions. We assume no responsibilities for any consequences of your using any codes in the platform. All publications using the platform should acknowledge the use of “PlatEMO” and cite the following literature:

**Ye Tian, Ran Cheng, Xingyi Zhang, and Yaochu Jin, “PlatEMO: A MATLAB platform for evolutionary multi-objective optimization [educational forum],” IEEE Computational Intelligence Magazine, 2017, 12(4): 73-87.**

If you have any comment or suggestion to PlatEMO, please send it to *field910921@gmail.com* (Dr. Ye Tian). If you want to add your code to PlatEMO, please send the ready-to-use code and the relevant literature to *field910921@gmail.com* as well. You can obtain the newest version of PlatEMO from GitHub.

# Contents

|      |                                           |    |
|------|-------------------------------------------|----|
| I.   | Quick Start.....                          | 1  |
| II.  | Using PlatEMO without GUI .....           | 2  |
|      | A. Solving Benchmark Problems.....        | 2  |
|      | B. Solving User-Defined Problems .....    | 3  |
|      | C. Collecting the Results .....           | 5  |
| III. | Using PlatEMO with GUI .....              | 7  |
|      | A. Functions of Test Module .....         | 7  |
|      | B. Functions of Application Module .....  | 8  |
|      | C. Functions of Experiment Module .....   | 9  |
|      | D. Labels of Algorithms and Problems..... | 9  |
| IV.  | Extending PlatEMO .....                   | 11 |
|      | A. ALGORITHM Class .....                  | 11 |
|      | B. PROBLEM Class .....                    | 13 |
|      | C. SOLUTION Class .....                   | 17 |
|      | D. Whole Procedure of One Run .....       | 18 |
|      | E. Metric Function.....                   | 19 |
| V.   | List of Algorithms .....                  | 20 |
| VI.  | List of Problems .....                    | 26 |

# I. Quick Start

**Requirement:** MATLAB R2018a or higher (PlatEMO without GUI) or MATLAB R2020b or higher (PlatEMO with GUI) with Parallel Computing Toolbox and Statistics and Machine Learning Toolbox

PlatEMO provides a variety of algorithms for solving optimization problems in a black-box manner. To this end, users should define the optimization problem, select an algorithm, and set the parameter values, by means of one of the following ways:

1) Calling the main function with parameters:

```
platemo('problem',@SOP_F1,'algorithm',@GA,'Name',Value,...);
```

Then the specified benchmark problem will be solved by the specified algorithm with specified parameter settings, where the result can be displayed, saved, or returned (see *Solving Benchmark Problems* for details).

2) Calling the main function with parameters:

```
f1 = @(x,d) sum(x*d);
f2 = @(x,d) 1-sum(x*d);
platemo('objFcn',f1,'conFcn',f2,'algorithm',@GA,...);
```

Then the user-defined problem will be solved by the specified algorithm with specified parameter settings (see *Solving User-Defined Problems* for details).

3) Calling the main function without parameter:

```
platemo();
```

Then a GUI with three modules will be displayed, where the test module is used to visually investigate the performance of an algorithm on a benchmark problem (see *Functions of Test Module* for details), the application module is used to solve user-defined problems (see *Functions of Application Module* for details), and the experiment module is used to statistically analyze the performance of multiple algorithms on multiple benchmark problems (see *Functions of Experiment Module* for details).

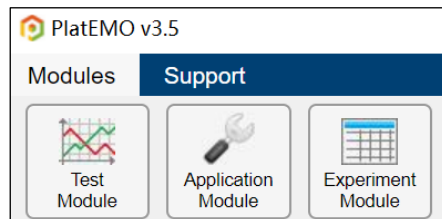

## II. Using PlatEMO without GUI

### A. Solving Benchmark Problems

Users can use PlatEMO without GUI by calling the main function `platemo()` with parameters like

```
platemo('Name1',Value1,'Name2',Value2,'Name3',Value3,...);
```

where all the acceptable names and values are

| Name        | Data type               | Default value     | Description                           |
|-------------|-------------------------|-------------------|---------------------------------------|
| 'algorithm' | Function handle or cell | dependent         | Class of algorithm                    |
| 'problem'   | Function handle or cell | dependent         | Class of benchmark problem            |
| 'N'         | Positive integer        | 100               | Population size                       |
| 'M'         | Positive integer        | dependent         | Number of objectives                  |
| 'D'         | Positive integer        | dependent         | Number of variables                   |
| 'maxFE'     | Positive integer        | 10000             | Number of evaluations                 |
| 'save'      | Integer                 | 0                 | Number of saved populations           |
| 'outputFcn' | Function handle         | @ALGORITHM.Output | Function called before each iteration |

- 'algorithm' denotes the algorithm to be run, whose value should be the function handle of an algorithm, such as @GA. The value can also be a cell like { @GA, p1, p2, ... }, where p1, p2, ... specify the parameter values of the algorithm.
- 'problem' denotes the benchmark problem to be solved, whose value should be the function handle of a benchmark problem, such as @SOP\_F1. The value can also be a cell like { @SOP\_F1, p1, p2, ... }, where p1, p2, ... specify the parameter values of the benchmark problem.
- 'N' denotes the population size of the algorithm, which usually equals to the number of solutions in the final population.
- 'M' denotes the number of objectives of the benchmark problem, which is valid for some multi-objective benchmark problems.
- 'D' denotes the number of decision variables of the benchmark problem, which is valid for some benchmark problems.
- 'maxFE' denotes the maximum number of available function evaluations, which usually equals to the product of population size and number of generations.
- 'save' denotes the number of saved populations, where the populations are saved to a file if the value is positive and displayed in a figure if the value is zero (see

*Collecting the Results* for details).

- `'outputFcn'` denotes the function called before each iteration of the algorithm. An output function has two inputs and no output, where the first input is the current ALGORITHM object and the second input is the current PROBLEM object.

For example, the following code runs the genetic algorithm on the sphere function with a population size of 50, where the populations are displayed in a figure:

```
platemo('algorithm', @GA, 'problem', @SOP_F1, 'N', 50);
```

The following code runs NSGA-II on 5-objective 40-variable DTLZ2 for 20000 function evaluations, where the populations are saved to a file:

```
platemo('algorithm', @NSGAI, 'problem', @DTLZ2, 'M', 5, 'D', 40, 'maxFE', 20000, 'save', 10);
```

The following code runs MOEA/D with Tchebycheff approach on ZDT1 for ten times, where the populations obtained in each time are saved to a file:

```
for i = 1 : 10
    platemo('algorithm', { @MOEA, 2 }, 'problem', @ZDT1, 'save', 5);
end
```

Note that users need not specify all the parameters as each of them has a default value.

## B. Solving User-Defined Problems

When the parameter `'problem'` is not specified, users can define their own problem by specifying the following parameters:

| Name                     | Data type               | Default value       | Description                                                                                             |
|--------------------------|-------------------------|---------------------|---------------------------------------------------------------------------------------------------------|
| <code>'encoding'</code>  | char                    | <code>'real'</code> | Encoding scheme                                                                                         |
| <code>'objFcn'</code>    | Function handle or cell | @ (x, d) sum (x)    | Objective functions. All objectives are to be minimized                                                 |
| <code>'conFcn'</code>    | Function handle or cell | @ (x, d) 0          | Constraint functions. A constraint is satisfied if and only if the constraint violation is not positive |
| <code>'lower'</code>     | Row vector              | 0                   | Lower bounds of variables                                                                               |
| <code>'upper'</code>     | Row vector              | 1                   | Upper bounds of variables                                                                               |
| <code>'initFcn'</code>   | Function handle         | []                  | Function for initializing a population                                                                  |
| <code>'decFcn'</code>    | Function handle         | []                  | Function for repairing invalid solution                                                                 |
| <code>'parameter'</code> | Cell                    | { }                 | Data                                                                                                    |

- `'encoding'` denotes the encoding scheme of the problem, whose value can be

'real' (variables are real or integer numbers), 'binary' (variables are binary numbers), or 'permutation' (variables constitute a permutation). Algorithms may use different reproduction operators for different encoding schemes.

- 'objFcn' denotes the objective functions of the problem, whose value can be a function handle (a single objective) or cell (multiple objectives). An objective function has two inputs and an output, where the first input is a decision vector, the second input is the data specified by 'parameter' (this input can be omitted if 'parameter' is not specified), and the output is the objective value. All the objectives are to be minimized.
- 'conFcn' denotes the constraint functions of the problem, whose value can be a function handle (a single constraint) or cell (multiple constraints). A constraint function has two inputs and an output, where the first input is a decision vector, the second input is the data specified by 'parameter' (this input can be omitted if 'parameter' is not specified), and the output is the constraint violation. A constraint is satisfied if and only if the constraint violation is not positive.
- 'lower' denotes the lower bounds of variables, which is effective only when the value of 'encoding' is 'real'.
- 'upper' denotes the upper bounds of variables, which is effective only when the value of 'encoding' is 'real'.
- 'initFcn' denotes the function for initializing a population, whose value should be a function handle having two inputs and an output, where the first input is the number of solutions in the population, the second input is the data specified by 'parameter' (this input can be omitted if 'parameter' is not specified), and the output is a matrix consisting of the decision vectors in the initial population. This function is called at the beginning of most algorithms.
- 'decFcn' denotes the function for repairing invalid solution, whose value should be a function handle having two inputs and an output, where the first input is a decision vector, the second input is the data specified by 'parameter' (this input can be omitted if 'parameter' is not specified), and the output is the repaired decision vector. This function is called before the objective calculation of each solution.
- 'parameter' denotes the data of the problem, which is used as the second input (optional) of the functions specified by 'objFcn', 'conFcn', 'initFcn', and 'decFcn'.

For example, the following code solves a unimodal problem with 10 variables by differential evolution:

```
platemo('objFcn',@(x)sum(x.^2),'lower',zeros(1,10)-10,  
'upper',zeros(1,10)+10,'algorithm',@DE);
```

The following code solves a rotated unimodal problem with 10 variables by the default algorithm, where the rotation matrix is specified via 'parameter':

```
platemo('objFcn', @(x,d) sum((x*d).^2), 'lower', zeros(1,10) - 10, 'upper', zeros(1,10)+10, 'parameter', rand(10));
```

The following code solves a constrained bi-objective problem with 20 variables by NSGA-II with a population size of 50:

```
f1 = @(x) x(1)*sum(x(2:end));
f2 = @(x) sqrt(1-x(1)^2)*sum(x(2:end));
g1 = @(x) 1-sum(x(2:end));
platemo('objFcn', {f1, f2}, 'conFcn', g1, 'lower', zeros(1,20), 'upper', ones(1,20), 'algorithm', @NSGAII, 'N', 50);
```

### C. Collecting the Results

The generated populations can be displayed, saved, or returned after the algorithm terminates. If the main function is called like

```
[Dec, Obj, Con] = platemo(...);
```

Then the final population will be returned, where `Dec` is a matrix consisting of the decision vectors in the final population, `Obj` is a matrix consisting of the objective values in the final population, and `Con` is a matrix consisting of the constraint violations in the final population. If the main function is called like

```
platemo('save', Value, ...);
```

Then the generated populations will be displayed in a figure if `Value` is zero (default), where various plots can be displayed by switching the `Data source` menu on the figure.

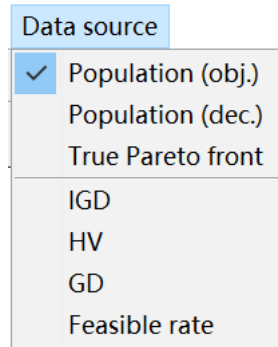

While if `Value` is positive, the generated populations will be saved to a MAT file named as `PlatEMO\Data\alg\alg_pro_M_D_run.mat`, where `alg` is the algorithm name, `pro` is the problem name, `M` is the number of objectives, `D` is the number of variables, and `run` automatically increases from 1 until the file name does not exist. A file saves a `cell result` consisting of the generated populations and a `struct metric` consisting



of the metric values. The whole optimization process of the algorithm is divided into Value equal intervals, where the first column of `result` stores the number of consumed function evaluations at the last iteration of each interval, the second column of `result` stores the population at the last iteration of each interval, and `metric` stores the metric values of the stored populations. Note that the above are achieved by the default output function `@ALGORITHM.Output`, while users can collect the results in their own ways by specifying the value of '`outputFcn`' to the handle of a user-defined output function.

```
result =  
6×2 cell array  
    {[ 1650]}    {1×50 SOLUTION}  
    {[ 3300]}    {1×50 SOLUTION}  
    {[ 5000]}    {1×50 SOLUTION}  
    {[ 6650]}    {1×50 SOLUTION}  
    {[ 8300]}    {1×50 SOLUTION}  
    {[10000]}    {1×50 SOLUTION}
```

```
metric =  
struct with fields:  
    runtime: 0.3317  
    IGD: [6×1 double]
```

Besides, the metric values can be automatically calculated and saved in the experiment module of the GUI. To calculate the metric values manually, users should obtain the optimums of the problem and then call the metric functions, for example,

```
pro = DTLZ2();  
IGD(result{end},pro.optimum);
```

### III. Using PlatEMO with GUI

#### A. Functions of Test Module

Users can use PlatEMO with GUI by calling the main function `platemo()` without parameter like

```
platemo();
```

Then the test module of the GUI will be displayed, which is used to visually investigate the performance of an algorithm on a benchmark problem.

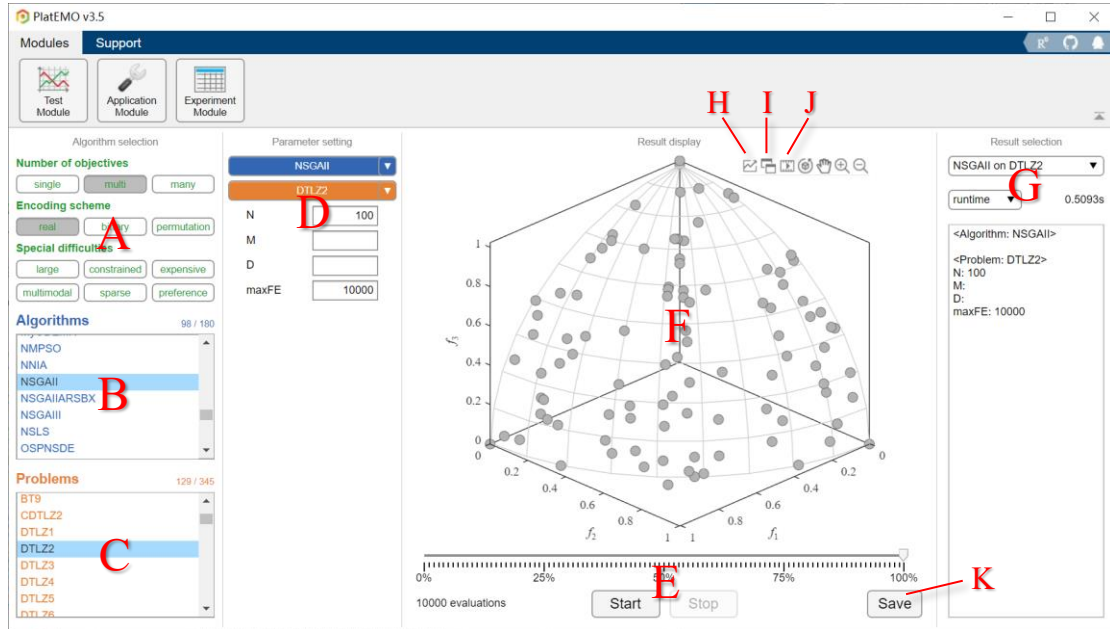

Users should first determine the type of problems in **Region A** (see *Labels of Algorithms and Problems* for details), select an algorithm in **Region B**, select a benchmark problem in **Region C**, and set the parameter values in **Region D**. Then, the optimization process can be started and controlled in **Region E**, where the real-time result is displayed in **Region F** and the historical results can be reviewed in **Region G**.

Pressing **Button H** can choose the plot to be displayed, pressing **Button I** can display the plot in a new figure and save the data in the plot to workspace, pressing **Button J** can save the whole optimization process to a GIF image with 20 frames, and pressing **Button K** can save the current population to a text or MAT file, where a  $N \times (D + M + P)$  matrix is saved with  $N$  being the number of solutions,  $D$  being the number of decision variables,  $M$  being the number of objectives, and  $P$  being the number of constraints.

## B. Functions of Application Module

Users can press the menu button to switch to the application module, which is used to solve user-defined problems.

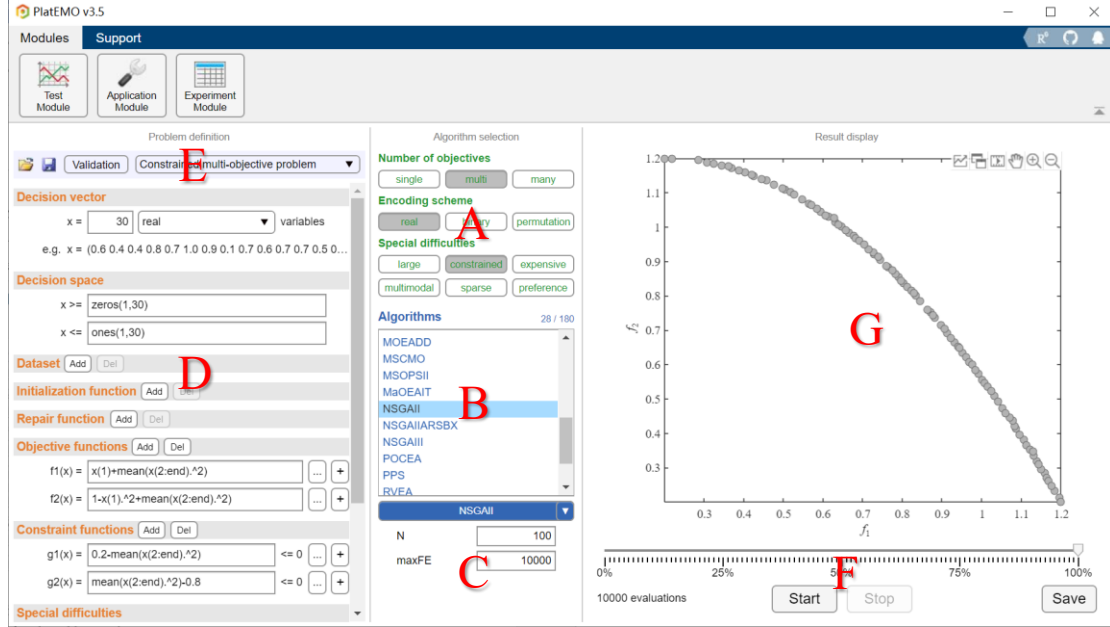

Users should first define the problem in **Region D**, whose details are the same to those in *Solving User-Defined Problems*, where

- **Decision vector** is the same to `'encoding'`
- **Decision space** is the same to `'lower'` and `'upper'`
- **Dataset** is the same to `'parameter'`
- **Initialization function** is the same to `'initFcn'`
- **Repair function** is the same to `'decFcn'`
- **Objective functions** is the same to `'objFcn'`
- **Constraint functions** is the same to `'conFcn'`

For simplicity, users can only specify **Decision vector**, **Decision space**, **Objective functions**, and **Constraint functions**. Meanwhile, users can save or load a problem, check the validity of the problem, and select an example problem in **Region E**. Then, the type of problems can be automatically determined in **Region A**, while users should select an algorithm in **Region B** and set the parameter values in **Region C**. The optimization process can be started and controlled in **Region F**, and the real-time result is displayed in **Region G**.

When pressing the Validation button or Start button, a `UserProblem` object will be instantiated and its validity will be checked by calculating the objective values and constraint violations of a solution, i.e., calling `objFcn(decFcn(initFcn(1)))` and `conFcn(decFcn(initFcn(1)))` when **Dataset** is not defined and calling `objFcn(decFcn(initFcn(1,parameter),parameter),parameter)` and

`conFcn(decFcn(initFcn(1,parameter),parameter),parameter)` when **Dataset** is defined.

Users can save the current problem as a subclass of `PROBLEM` in **Region E**, which can be further used in other modules (loaded via Open File).

### C. Functions of Experiment Module

Users can press the menu button to switch to the experiment module, which is used to statistically analyze the performance of multiple algorithms on multiple problems.

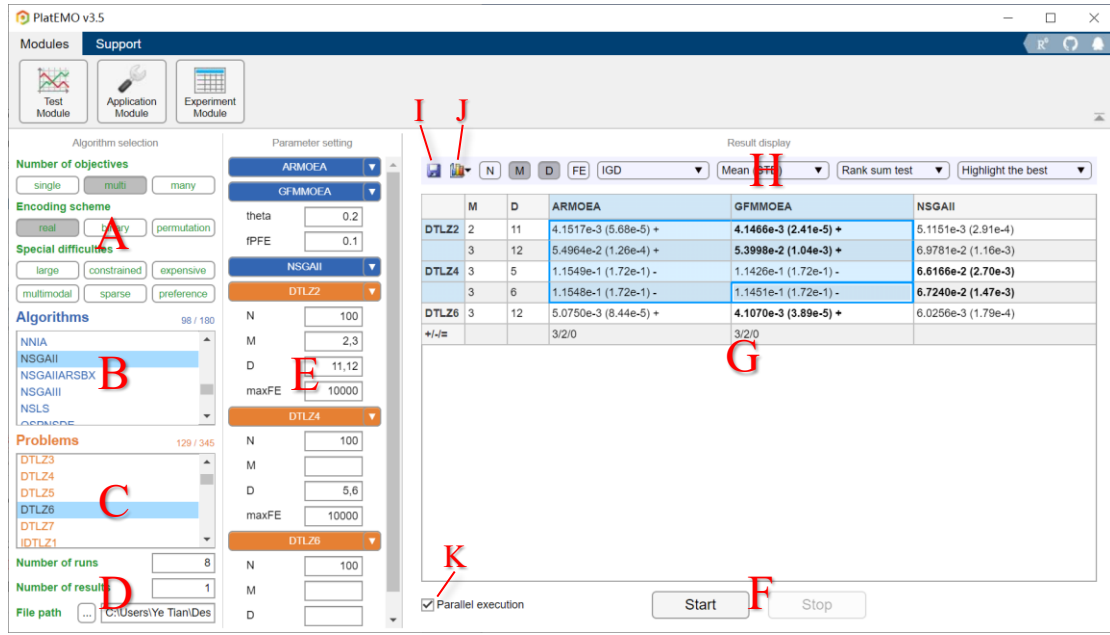

Users should first determine the type of problems in **Region A** (see *Labels of Algorithms and Problems* for details), select multiple algorithms in **Region B**, select multiple benchmark problems in **Region C**, configure the experimental settings in **Region D**, and set the parameter values in **Region E**, where the number of objectives  $M$  and the number of variables  $D$  can be vectors. Then, the optimization process can be started and controlled in **Region F**, where the statistical results are listed in **Region G**.

The statistical results to be listed can be customized in **Region H**. Pressing **Button I** can save the table to an Excel, TeX, TXT, or MAT file, and pressing **Button J** can display the results in the selected cells of the table in a new figure. **Button K** determines whether the experiment is performed on a single CPU (in sequence) or all the CPUs (in parallel). All the results are saved to MAT files in the folder specified in **Region D**. If a result file already exists, the file will be loaded and the algorithm will not be run.

### D. Labels of Algorithms and Problems

Each algorithm or benchmark problem is tagged with labels by the comment in the

second line of its main function. For example, in the code of `PSO.m`:

```
classdef PSO < ALGORITHM
% <single> <real> <large/none> <constrained/none>
```

which indicates the types of problems that the algorithm can solve. All the labels are

| Label         | Description                                                                                                                                    |
|---------------|------------------------------------------------------------------------------------------------------------------------------------------------|
| <single>      | The problem has a single objective                                                                                                             |
| <multi>       | The problem has two or three objectives                                                                                                        |
| <many>        | The problem has four or more objectives                                                                                                        |
| <real>        | The decision variables are real or integer numbers                                                                                             |
| <binary>      | The decision variables are binary numbers                                                                                                      |
| <permutation> | The decision variables constitute a permutation                                                                                                |
| <large>       | The problem has more than 100 decision variables                                                                                               |
| <constrained> | The problem has at least one constraint                                                                                                        |
| <expensive>   | The objectives are computationally expensive, i.e., only a very limited number of function evaluations are available                           |
| <multimodal>  | There exist multiple optimal solutions with similar objective values but considerably different decision vectors, all of which should be found |
| <sparse>      | Most decision variables of the optimal solutions are zero                                                                                      |
| <preference>  | Only the optimal solutions in the predefined regions of the Pareto front are expected to be found                                              |
| <none>        | Empty label                                                                                                                                    |

An algorithm may have multiple sets of labels, where the Cartesian product between all the label sets constitutes all the types of problems that can be solved by the algorithm. If the label sets of an algorithm are <single> <real> <constrained/none>, it will be able to solve single-objective continuous optimization problems with or without constraints. On the other hand, the label sets <single> <real> mean that the algorithm can only solve unconstrained problems, the label sets <single> <real> <constrained> mean that the algorithm can only solve constrained problems, and the label sets <single> <real/binary> mean that the algorithm can solve problems with either real variables or binary variables.

Each algorithm or benchmark problem should be tagged with labels, otherwise it will not be appeared in the lists in the GUI. When determining the type of problems in **Region A**, the algorithms that can solve such type of problems will be appeared in the list in **Region B**, and the benchmark problems belonging to this type will be appeared in the list in **Region C**. The labels of all the algorithms and benchmark problems in PlatEMO are referred to *List of Algorithms* and *List of Problems*, respectively.

## IV. Extending PlatEMO

### A. *ALGORITHM Class*

An algorithm should be written as a subclass of `ALGORITHM` and put in the folder `PlatEMO\Algorithms`, which contains the following properties and methods:

| Property                   | Specified by                 | Description                                                                                      |
|----------------------------|------------------------------|--------------------------------------------------------------------------------------------------|
| parameter                  | Users                        | Parameters of the algorithm                                                                      |
| save                       | Users                        | Number of populations saved in an execution                                                      |
| outputFcn                  | Users                        | Function called in <code>NotTerminated()</code>                                                  |
| pro                        | <code>Solve()</code>         | Problem solved in current execution                                                              |
| result                     | <code>NotTerminated()</code> | Populations saved in current execution                                                           |
| metric                     | <code>NotTerminated()</code> | Metric values of current populations                                                             |
| Method                     | Be redefined                 | Description                                                                                      |
| <code>ALGORITHM</code>     | Cannot                       | Set the properties specified by users                                                            |
| <code>Solve</code>         | Cannot                       | Call <code>alg.Solve(pro)</code> to solve problem <code>pro</code> by algorithm <code>alg</code> |
| <code>main</code>          | Must                         | Main procedure of the algorithm                                                                  |
| <code>NotTerminated</code> | Cannot                       | Function called before each iteration in <code>main()</code>                                     |
| <code>ParameterSet</code>  | Cannot                       | Set the parameter values according to <code>parameter</code>                                     |

Each algorithm should inherit `ALGORITHM` and redefine the method `main()`. For example, the code of `GA.m` is

```

1  classdef GA < ALGORITHM
2  % <single><real/binary/permutation><large/none><constrained/none>
3  % Genetic algorithm
4  % proC --- 1 --- Probability of crossover
5  % disC --- 20 --- Distribution index of crossover
6  % proM --- 1 --- Expectation of the number of mutated variables
7  % disM --- 20 --- Distribution index of mutation
8
9  %----- Reference -----
10 % J. H. Holland, Adaptation in Natural and Artificial Systems,
11 % MIT Press, 1992.
12 %-----
13
14  methods
15      function main(Alg, Pro)

```

```

16         [proC,disC,proM,disM] = Alg.ParameterSet(1,20,1,20);
17         P = Pro.Initialization();
18         while Alg.NotTerminated(P)
19             P1 = TournamentSelection(2,Pro.N,FitnessSingle(P));
20             O = OperatorGA(P(P1),{proC,disC,proM,disM});
21             P = [P,O];
22             [~,rank] = sort(FitnessSingle(P));
23             P = P(rank(1:Pro.N));
24         end
25     end
26 end

```

The functions of each line are as follows:

- Line 1: Inheriting the `ALGORITHM` class;
- Line 2: Tagging the algorithm with labels (see *Labels of Algorithms and Problems* for details);
- Line 3: Full name of the algorithm;
- Lines 4-7: Parameter name --- default value --- description, which are shown in the parameter setting list in the GUI;
- Lines 9-12: Reference of the algorithm;
- Line 15: Redefining the method of main procedure;
- Line 16: Obtaining the parameter values specified by users, where `1, 20, 1, 20` are default values of the four parameters `proC, disC, proM, disM`;
- Line 17: Obtaining an initial population by calling a method of the problem;
- Line 18: Storing the last population and checking whether the number of function evaluations exceeds; if so, the algorithm will terminate immediately;
- Line 19: Binary tournament based mating selection by calling a public function;
- Line 20: Using the mating pool to generate offsprings by calling a public function;
- Line 21: Combing the current population with the offsprings;
- Line 22: Sorting the solutions based on their fitness calculated by a public function;
- Line 23: Retaining the solutions with better fitness for next iteration.

In the above codes, the functions `ParameterSet()` and `NotTerminated()` are provided by the `ALGORITHM` class, and the function `Initialization()` is provided by the `PROBLEM` class. Besides, the functions `TournamentSelection()`, `FitnessSingle()` and `OperatorGA()` are public functions in the folder `PlatEMO\Algorithms\Utility` functions, which provides a number of operations commonly used in algorithms. The following table lists the functions that can be used in algorithms, where the details of them are referred to the comments in their codes; besides, their techniques for efficiency improvement can be found *here*.

| Function Name               | Description                                                                                            |
|-----------------------------|--------------------------------------------------------------------------------------------------------|
| ALGORITHM.<br>NotTerminated | Function called before each iteration of the algorithm                                                 |
| ALGORITHM.<br>ParameterSet  | Set the parameter values specified by users                                                            |
| PROBLEM.<br>Initialization  | Initialize a population for the problem                                                                |
| CrowdingDistance            | Crowding distance calculation for multi-objective optimization                                         |
| FitnessSingle               | Fitness calculation for single-objective optimization                                                  |
| NDSort                      | Non-dominated sorting                                                                                  |
| OperatorDE                  | The reproduction operator of differential evolution                                                    |
| OperatorFEP                 | The reproduction operator of fast evolutionary programming                                             |
| OperatorGA                  | The reproduction operators of genetic algorithm                                                        |
| OperatorGAhalf              | The reproduction operators of genetic algorithm, where only the first half of offsprings are generated |
| OperatorPSO                 | The reproduction operator of particle swarm optimization                                               |
| RouletteWheel<br>Selection  | Roulette-wheel selection                                                                               |
| Tournament<br>Selection     | Tournament selection                                                                                   |
| UniformPoint                | Generate a set of uniformly distributed points                                                         |

### B. PROBLEM Class

A benchmark problem should be written as a subclass of `PROBLEM` and put in the folder `PlatEMO\Problems`, which contains the following properties and methods:

| Property  | Specified by           | Description                                                                                                                                                                                             |
|-----------|------------------------|---------------------------------------------------------------------------------------------------------------------------------------------------------------------------------------------------------|
| N         | Users                  | Population size of algorithms                                                                                                                                                                           |
| M         | Users and<br>Setting() | Number of objectives of the problem                                                                                                                                                                     |
| D         | Users and<br>Setting() | Number of decision variables of the problem                                                                                                                                                             |
| maxFE     | Users                  | Maximum number of function evaluations                                                                                                                                                                  |
| FE        | SOLUTION()             | Number of function evaluations consumed in current execution                                                                                                                                            |
| encoding  | Setting()              | Encoding scheme of the problem                                                                                                                                                                          |
| lower     | Setting()              | Lower bounds of the decision variables                                                                                                                                                                  |
| upper     | Setting()              | Upper bounds of the decision variables                                                                                                                                                                  |
| optimum   | GetOptimum()           | Optimal values of the problem, such as the minimum objective value of single-objective optimization problems and a set of points on the Pareto front of multi-objective optimization problems           |
| PF        | GetPF()                | Pareto front of the problem, such as a 1-D curve of bi-objective optimization problems, a 2-D surface of tri-objective optimization problems, and feasible regions of constrained optimization problems |
| parameter | Users                  | Parameters of the problem                                                                                                                                                                               |



| Method         | Be redefined | Description                                                                                                                                         |
|----------------|--------------|-----------------------------------------------------------------------------------------------------------------------------------------------------|
| PROBLEM        | Cannot       | Set the properties specified by users                                                                                                               |
| Setting        | Must         | Default settings of the problem                                                                                                                     |
| Initialization | Can          | Initialize a population for the problem                                                                                                             |
| CalDec         | Can          | Repair invalid solutions in a population                                                                                                            |
| CalObj         | Must         | Calculate the objective values of solutions in a population. All objectives are to be minimized                                                     |
| CalCon         | Can          | Calculate the constraint violations of solutions in a population. A constraint is satisfied if and only if the constraint violation is not positive |
| GetOptimum     | Can          | Generate the optimal values and store in optimum                                                                                                    |
| GetPF          | Can          | Generate the Pareto front and store in PF                                                                                                           |
| DrawDec        | Can          | Display the decision variables of a population                                                                                                      |
| DrawObj        | Can          | Display the objective values of a population                                                                                                        |
| Current        | Cannot       | Static method for getting or setting the current PROBLEM object                                                                                     |
| ParameterSet   | Cannot       | Set the parameter values according to parameter                                                                                                     |

Each benchmark problem should inherit `PROBLEM` and redefine the methods `Setting()` and `CalObj()`. For example, the code of `SOP_F1.m` is

```

1  classdef SOP_F1 < PROBLEM
2  % <single><real><expensive/none>
3  % Sphere function
4
5  %----- Reference -----
6  % X. Yao, Y. Liu, and G. Lin, Evolutionary programming made
7  % faster, IEEE Transactions on Evolutionary Computation, 1999, 3
8  % (2): 82-102.
9  %-----
10
11  methods
12      function Setting(obj)
13          obj.M = 1;
14          if isempty(obj.D); obj.D = 30; end
15          obj.lower = zeros(1,obj.D) - 100;
16          obj.upper = zeros(1,obj.D) + 100;
17          obj.encoding = 'real';
18      end
19      function PopObj = CalObj(obj,PopDec)
20          PopObj = sum(PopDec.^2,2);
21      end
22  end

```

The functions of each line are as follows:

- Line 1: Inheriting the `PROBLEM` class;
- Line 2: Tagging the problem with labels (see *Labels of Algorithms and Problems* for details);
- Line 3: Full name of the problem;
- Lines 5-9: Reference of the problem;
- Line 12: Redefining the method of default parameter settings;
- Line 13: Setting the number of objectives;
- Line 14: Setting the number of decision variables if it is not specified by users;
- Lines 15-16: Setting the lower bounds and upper bounds of decision variables;
- Line 17: Setting the encoding scheme of the problem;
- Line 19: Redefining the method of calculating objective values;
- Line 20: Calculating the objective values of solutions in a population.

The method `Initialization()` randomly initializes a population for the problem. This method can be redefined to specify a novel initialization strategy. For example, `Sparse_NN.m` initializes a population in which half the decision variables are zero:

```
function Population = Initialization(obj,N)
    if nargin < 2; N = obj.N; end
    PopDec = (rand(N,obj.D)-0.5)*2.*randi([0 1],N,obj.D);
    Population = SOLUTION(PopDec);
end
```

The method `CalDec()` repairs invalid solutions in a population, where each decision variable will be set to the boundary values if it is larger than the upper bound or smaller than the lower bound. This method can be redefined to specify a novel repair strategy. For example, `MOKP.m` repairs solutions that exceed the capacity:

```
function PopDec = CalDec(obj,PopDec)
    C = sum(obj.W,2)/2;
    [~,rank] = sort(max(obj.P./obj.W));
    for i = 1 : size(PopDec,1)
        while any(obj.W*PopDec(i,:) > C)
            k = find(PopDec(i,rank),1);
            PopDec(i,rank(k)) = 0;
        end
    end
end
```

The method `CalCon()` returns zero as the constraint violation of the solutions in a population, i.e., all the solutions are feasible. This method can be redefined to specify constraint functions for the problem. For example, `MW1.m` calculates a constraint for each solution:

```
function PopCon = CalCon(obj,X)
    PopObj = obj.CalObj(X);
    l = sqrt(2)*PopObj(:,2) - sqrt(2)*PopObj(:,1);
    PopCon = sum(PopObj,2) - 1 - 0.5*sin(2*pi*l).^8;
end
```

Use `all(PopCon<=0,2)` to determine whether each solution is feasible or not. Note that equality constraints should be relaxed to such inequality constraints. The method `GetOptimum()` can be redefined to specify the optimal values of the problem. For example, `SOP_F8.m` returns the optimal value of the objective function:

```
function R = GetOptimum(obj,N)
    R = -418.9829*obj.D;
end
```

and `DTLZ2.m` returns a set of uniformly distributed points on the Pareto front:

```
function R = GetOptimum(obj,N)
    R = UniformPoint(N,obj.M);
    R = R./repmat(sqrt(sum(R.^2,2)),1,obj.M);
end
```

The strategies for sampling points on different Pareto fronts can be found *here*. The method `GetPF()` can be redefined to specify the Pareto front or feasible regions of the problem for the visualization achieved in `DrawObj()`. For example, `DTLZ2.m` returns the data for plotting the 2-D or 3-D Pareto front:

```
function R = GetPF(obj)
    if obj.M == 2
        R = obj.GetOptimum(100);
    elseif obj.M == 3
        a = linspace(0,pi/2,10)';
        R = {sin(a)*cos(a'), sin(a)*sin(a'), cos(a)*ones(size(a'))};
    else
        R = [];
    end
end
```

and `MW1.m` returns the data for plotting the feasible regions:

```
function R = GetPF(obj)
    [x,y] = meshgrid(linspace(0,1,400),linspace(0,1.5,400));
    z = nan(size(x));
    fes = x+y-1-0.5*sin(2*pi*(sqrt(2)*y-sqrt(2)*x)).^8 <= 0;
    z(fes&0.85*x+y>=1) = 0;
    R = {x,y,z};
```

```
end
```

The method `DrawDec()` displays the decision variables of a population, which is used for the visualization of results in the GUI. This method can be redefined to specify a novel visualization method. For example, `TSP.m` displays the route of the best solution:

```
function DrawDec(obj,P)
    [~,best] = min(P.objs);
    Draw(obj.R(P(best).dec([1:end,1]),:),'-k','LineWidth',1.5);
    Draw(obj.R);
end
```

The method `DrawObj()` displays the objective values of a population, which is used for the visualization of results in the GUI. This method can be redefined to specify a novel visualization method. For example, `Sparse_CD.m` adds labels to the axes:

```
function DrawObj(obj,P)
    Draw(P.objs,{'Kernel k-means','Ratio cut',[]});
end
```

where `Draw()` is a function in the folder `PlatEMO\GUI` for displaying data. The details of the above functions are referred to the comments in their codes.

### C. SOLUTION Class

A `SOLUTION` object denotes an individual, and an array of `SOLUTION` objects denote a population. The `SOLUTION` class contains the following properties and methods:

| Property              | Specified by                                                                                                                                                                                                                          | Description                                            |
|-----------------------|---------------------------------------------------------------------------------------------------------------------------------------------------------------------------------------------------------------------------------------|--------------------------------------------------------|
| <code>dec</code>      | Users                                                                                                                                                                                                                                 | Decision variables of the solution                     |
| <code>obj</code>      | <code>SOLUTION()</code>                                                                                                                                                                                                               | Objective values of the solution                       |
| <code>con</code>      | <code>SOLUTION()</code>                                                                                                                                                                                                               | Constraint violations of the solution                  |
| <code>add</code>      | <code>adds()</code>                                                                                                                                                                                                                   | Additional properties (e.g., velocity) of the solution |
| Method                | Description                                                                                                                                                                                                                           |                                                        |
| <code>SOLUTION</code> | Receive the decision variables and calculate the objective values and constraint violations of one or more solutions. <code>PROBLEM.FE</code> will be automatically increased by the number of <code>SOLUTION</code> objects returned |                                                        |
| <code>decs</code>     | Get the matrix of decision variables of multiple solutions                                                                                                                                                                            |                                                        |
| <code>objs</code>     | Get the matrix of objective values of multiple solutions                                                                                                                                                                              |                                                        |
| <code>cons</code>     | Get the matrix of constraint violations of multiple solutions                                                                                                                                                                         |                                                        |
| <code>adds</code>     | Get the matrix of additional properties of multiple solutions                                                                                                                                                                         |                                                        |
| <code>best</code>     | Get the feasible and best solution for single-objective optimization, or the feasible and non-dominated solutions for multi-objective optimization                                                                                    |                                                        |

For example, the following code generates a population with ten solutions, then gets

the objective matrix of the best solutions in the population:

```
Population = SOLUTION(rand(10,5));
BestObjs = Population.best.objs
```

Note that before generating solutions, the current PROBLEM object should be set by calling the static method `PROBLEM.Current()`, otherwise `SOLUTION` cannot calculate any objective value or instantiate any object.

## D. Whole Procedure of One Run

The following code uses the genetic algorithm to solve the sphere function:

```
Alg = GA();
Pro = SOP_F1();
Alg.Solve(Pro);
```

where the functions called in the execution of `Alg.Solve(Pro)` are as follows.

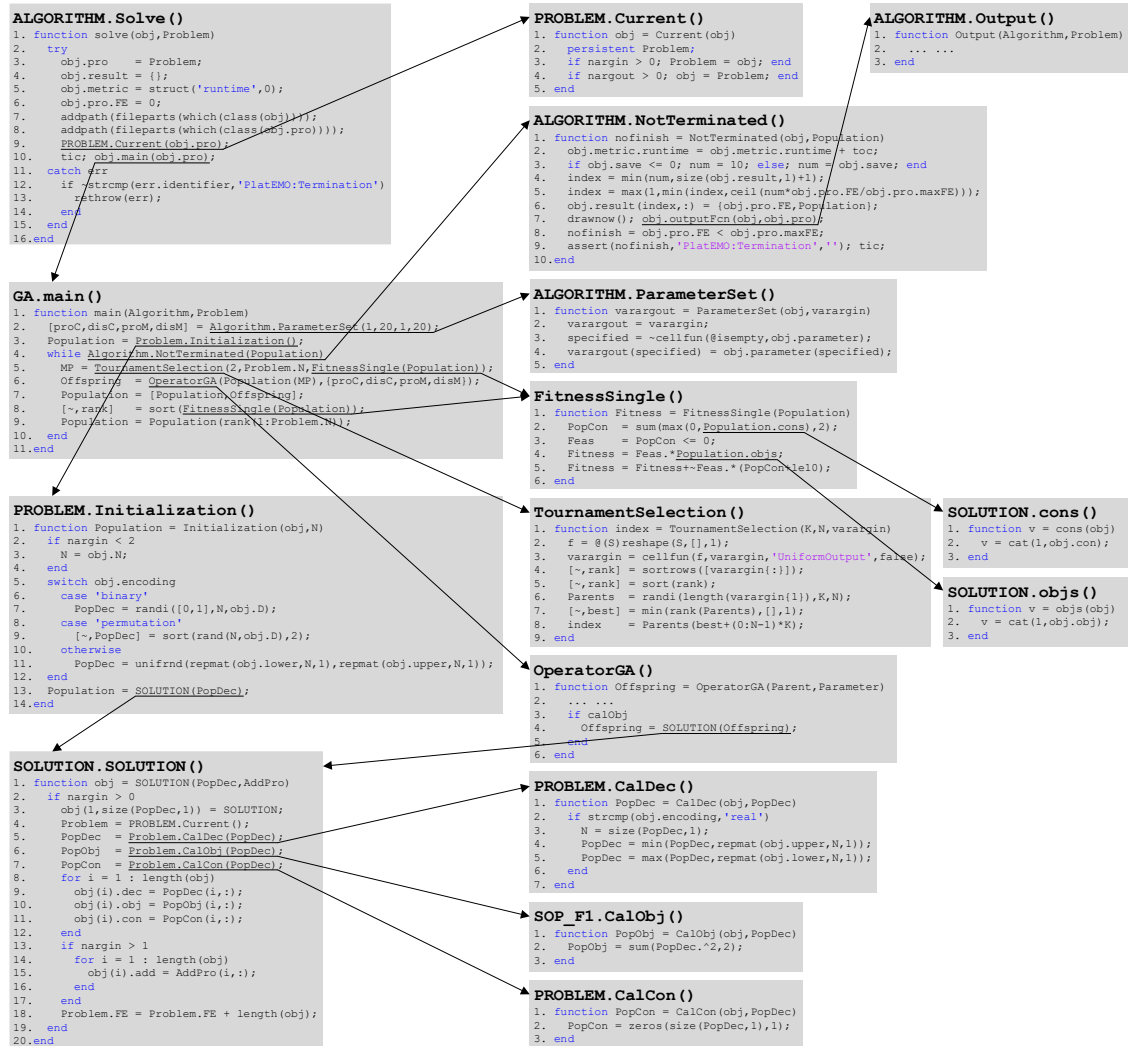

## E. Metric Function

A metric should be written as a function and put in the folder `PlatEMO\Metrics`. For example, the code of `IGD.m` is

```

1 function score = IGD(Population,optimum)
2 % <min>
3 % Inverted generational distance
4
5 %----- Reference -----
6 % C. A. Coello Coello and N. C. Cortes, Solving multiobjective
7 % optimization problem using an artificial immune system, Genetic
8 % Programming and Evolvable Machines, 2005, 6(2): 163-190.
9 %-----
10
11     PopObj = Population.best.objs;
12     if size(PopObj,2) ~= size(optimum,2)
13         score = nan;
14     else
15         score = mean(min(pdist2(optimum,PopObj),[],2));
16     end
17 end

```

The functions of each line are as follows:

- Line 1: Function declaration, where the first input is a population (i.e., an array of SOLUTION objects), the second input is the optimums of a problem (i.e., the optimum property of the problem), and the output is the metric value;
- Line 2: Tagging the metric with `<min>` (the smaller metric value the better) or `<max>` (the larger metric value the better);
- Line 3: Full name of the metric;
- Lines 5-9: Reference of the metric;
- Line 11: Obtaining the feasible and non-dominated solutions in the population;
- Lines 12-13: Returns `nan` if there is no feasible and non-dominated solution;
- Lines 14-15: Returns the IGD value of the feasible and non-dominated solutions.

## V. List of Algorithms

|    | Abbreviation | Full name                                                                 | single | multi | many | real | binary | permutation | large | constrained | expensive | multimodal | sparse | preference |
|----|--------------|---------------------------------------------------------------------------|--------|-------|------|------|--------|-------------|-------|-------------|-----------|------------|--------|------------|
| 1  | ABC          | Artificial bee colony algorithm                                           | √      |       |      | √    |        |             | √     | √           |           |            |        |            |
| 2  | AB-SAEA      | Adaptive Bayesian based surrogate-assisted evolutionary algorithm         |        | √     | √    | √    |        |             |       |             | √         |            |        |            |
| 3  | ACO          | Ant colony optimization                                                   | √      |       |      |      |        | √           | √     |             |           |            |        |            |
| 4  | Adam         | Adaptive moment estimation                                                | √      |       |      | √    |        |             | √     |             |           |            |        |            |
| 5  | AGE-II       | Approximation-guided evolutionary multi-objective algorithm II            |        | √     |      | √    | √      | √           |       |             |           |            |        |            |
| 6  | AGE-MOEA     | Adaptive geometry estimation-based many-objective evolutionary algorithm  |        | √     | √    | √    | √      | √           |       | √           |           |            |        |            |
| 7  | A-NSGA-III   | Adaptive NSGA-III                                                         |        | √     | √    | √    | √      | √           |       | √           |           |            |        |            |
| 8  | AR-MOEA      | Adaptive reference points based multi-objective evolutionary algorithm    |        | √     | √    | √    | √      | √           |       | √           |           |            |        |            |
| 9  | BCE-IBEA     | Bi-criterion evolution based IBEA                                         |        | √     | √    | √    | √      | √           |       |             |           |            |        |            |
| 10 | BCE-MOEA/D   | Bi-criterion evolution based MOEA/D                                       |        | √     | √    | √    | √      | √           |       |             |           |            |        |            |
| 11 | BFGS         | A quasi-Newton method proposed by Broyden, Fletcher, Goldfarb, and Shanno | √      |       |      | √    |        |             | √     |             |           |            |        |            |
| 12 | BiGE         | Bi-goal evolution                                                         |        |       | √    | √    | √      | √           |       |             |           |            |        |            |
| 13 | BSPGA        | Binary space partition tree based genetic algorithm                       | √      |       |      |      | √      |             | √     | √           |           |            |        |            |
| 14 | CA-MOEA      | Clustering based adaptive multi-objective evolutionary algorithm          |        | √     |      | √    | √      | √           |       |             |           |            |        |            |
| 15 | CCGDE3       | Cooperative coevolution GDE3                                              |        | √     |      | √    |        |             | √     |             |           |            |        |            |
| 16 | CCMO         | Coevolutionary constrained multi-objective optimization framework         |        | √     |      | √    | √      | √           |       | √           |           |            |        |            |
| 17 | c-DPEA       | Constrained dual-population evolutionary algorithm                        |        | √     |      | √    | √      | √           |       | √           |           |            |        |            |
| 18 | CMA-ES       | Covariance matrix adaptation evolution strategy                           | √      |       |      | √    |        |             | √     | √           |           |            |        |            |
| 19 | C-MOEA/D     | Constraint-MOEA/D                                                         |        | √     | √    | √    | √      | √           |       | √           |           |            |        |            |
| 20 | CMOEA-MS     | Constrained multiobjective evolutionary algorithm with multiple stages    |        | √     |      | √    | √      | √           |       | √           |           |            |        |            |
| 21 | CMOPSO       | Competitive mechanism based multi-objective particle swarm optimizer      |        | √     |      | √    |        |             |       |             |           |            |        |            |
| 22 | CPS-MOEA     | Classification and Pareto domination based multi-objective evolutionary   |        | √     |      | √    |        |             |       |             | √         |            |        |            |
| 23 | CSEA         | Classification based surrogate-assisted evolutionary algorithm            |        | √     | √    | √    |        |             |       |             | √         |            |        |            |
| 24 | CSO          | Competitive swarm optimizer                                               | √      |       |      | √    |        |             | √     | √           |           |            |        |            |
| 25 | C-TAEA       | Two-archive evolutionary algorithm for constrained MOPs                   |        | √     | √    | √    | √      | √           |       | √           |           |            |        |            |
| 26 | DAEA         | Duplication analysis based evolutionary algorithm                         |        | √     |      |      | √      |             |       |             |           |            |        |            |
| 27 | DCNSGA-III   | Dynamic constrained NSGA-III                                              |        | √     | √    | √    | √      | √           |       | √           |           |            |        |            |
| 28 | DE           | Differential evolution                                                    | √      |       |      | √    |        |             | √     | √           |           |            |        |            |
| 29 | DEA-GNG      | Decomposition based evolutionary algorithm guided by                      |        | √     | √    | √    | √      | √           |       |             |           |            |        |            |

|    | Abbreviation | Full name                                                                                  | single | multi | many | real | binary | permutation | large | constrained | expensive | multimodal | sparse | preference |
|----|--------------|--------------------------------------------------------------------------------------------|--------|-------|------|------|--------|-------------|-------|-------------|-----------|------------|--------|------------|
|    |              | growing neural gas                                                                         |        |       |      |      |        |             |       |             |           |            |        |            |
| 30 | DGEA         | Direction guided evolutionary algorithm                                                    |        | √     | √    | √    |        |             | √     |             |           |            |        |            |
| 31 | DMOEA-eC     | Decomposition-based multi-objective evolutionary algorithm with the e-constraint framework |        | √     |      | √    | √      | √           |       |             |           |            |        |            |
| 32 | dMOPSO       | MOPSO based on decomposition                                                               |        | √     |      | √    |        |             |       |             |           |            |        |            |
| 33 | DN-NSGA-II   | Decision space based niching NSGA-II                                                       |        | √     |      | √    |        |             |       |             |           | √          |        |            |
| 34 | DSPCMDE      | Dynamic selection preference-assisted constrained multiobjective differential evolution    |        | √     |      | √    | √      | √           |       | √           |           |            |        |            |
| 35 | DWU          | Dominance-weighted uniformity multi-objective evolutionary algorithm                       |        | √     |      | √    | √      | √           |       |             |           |            |        |            |
| 36 | EAG-MOEA/D   | External archive guided MOEA/D                                                             |        | √     |      | √    | √      | √           |       |             |           |            |        |            |
| 37 | EDN-ARMOEA   | Efficient dropout neural network based AR-MOEA                                             |        | √     | √    | √    |        |             |       |             | √         |            |        |            |
| 38 | EFR-RR       | Ensemble fitness ranking with a ranking restriction scheme                                 |        | √     | √    | √    | √      | √           |       |             |           |            |        |            |
| 39 | EGO          | Efficient global optimization                                                              | √      |       |      | √    |        |             |       |             | √         |            |        |            |
| 40 | EIM-EGO      | Expected improvement matrix based efficient global optimization                            |        | √     |      | √    |        |             |       |             | √         |            |        |            |
| 41 | e-MOEA       | Epsilon multi-objective evolutionary algorithm                                             |        | √     | √    | √    | √      | √           |       |             |           |            |        |            |
| 42 | EMyO/C       | Evolutionary many-objective optimization algorithm with clustering-based                   |        | √     | √    | √    |        |             |       |             |           |            |        |            |
| 43 | ENS-MOEA/D   | Ensemble of different neighborhood sizes based MOEA/D                                      |        | √     | √    | √    |        |             |       |             |           |            |        |            |
| 44 | FDV          | Fuzzy decision variable framework with various internal optimizers                         |        | √     | √    | √    |        |             | √     |             |           |            |        |            |
| 45 | FEP          | Fast evolutionary programming                                                              | √      |       |      | √    |        |             | √     | √           |           |            |        |            |
| 46 | FRCG         | Fletcher-Reeves conjugate gradient                                                         | √      |       |      | √    |        |             | √     |             |           |            |        |            |
| 47 | FROFI        | Feasibility rule with the incorporation of objective function information                  | √      |       |      | √    |        |             | √     | √           |           |            |        |            |
| 48 | GA           | Genetic algorithm                                                                          | √      |       |      | √    | √      | √           | √     | √           |           |            |        |            |
| 49 | GDE3         | Generalized differential evolution 3                                                       |        | √     |      | √    |        |             |       | √           |           |            |        |            |
| 50 | GFM-MOEA     | Generic front modeling based multi-objective evolutionary algorithm                        |        | √     | √    | √    | √      | √           |       |             |           |            |        |            |
| 51 | GLMO         | Grouped and linked mutation operator algorithm                                             |        | √     |      | √    |        |             | √     |             |           |            |        |            |
| 52 | g-NSGA-II    | g-dominance based NSGA-II                                                                  |        | √     |      | √    | √      | √           |       |             |           |            |        | √          |
| 53 | GrEA         | Grid-based evolutionary algorithm                                                          |        |       | √    | √    | √      | √           |       |             |           |            |        |            |
| 54 | HeE-MOEA     | Multiobjective evolutionary algorithm with heterogeneous ensemble based infill criterion   |        | √     |      | √    |        |             |       |             | √         |            |        |            |
| 55 | hpaEA        | Hyperplane assisted evolutionary algorithm                                                 |        | √     | √    | √    | √      | √           |       |             |           |            |        |            |
| 56 | HypE         | Hypervolume estimation algorithm                                                           |        | √     | √    | √    | √      | √           |       |             |           |            |        |            |
| 57 | IBEA         | Indicator-based evolutionary algorithm                                                     |        | √     | √    | √    | √      | √           |       |             |           |            |        |            |
| 58 | ICMA         | Indicator based constrained multi-objective algorithm                                      |        | √     |      | √    |        |             |       | √           |           |            |        |            |
| 59 | I-DBEA       | Improved decomposition-based evolutionary algorithm                                        |        | √     | √    | √    | √      | √           |       | √           |           |            |        |            |
| 60 | IM-MOEA      | Inverse modeling based multiobjective evolutionary algorithm                               |        | √     |      | √    |        |             | √     |             |           |            |        |            |
| 61 | IM-MOEA/D    | Inverse modeling multiobjective evolutionary algorithm based on decomposition              |        | √     |      | √    |        |             | √     |             |           |            |        |            |



|    | Abbreviation    | Full name                                                                                      | single | multi | many | real | binary | permutation | large | constrained | expensive | multimodal | sparse | preference |
|----|-----------------|------------------------------------------------------------------------------------------------|--------|-------|------|------|--------|-------------|-------|-------------|-----------|------------|--------|------------|
| 62 | IMODE           | Improved multi-operator differential evolution                                                 | √      |       |      | √    |        |             | √     | √           |           |            |        |            |
| 63 | I-SIBEA         | Interactive simple indicator-based evolutionary algorithm                                      |        | √     |      | √    | √      | √           |       |             |           |            |        | √          |
| 64 | KnEA            | Knee point driven evolutionary algorithm                                                       |        |       | √    | √    | √      | √           |       | √           |           |            |        |            |
| 65 | K-RVEA          | Surrogate-assisted RVEA                                                                        |        | √     | √    | √    |        |             |       |             | √         |            |        |            |
| 66 | KTA2            | Kriging-assisted Two_Arch2                                                                     |        | √     | √    | √    |        |             |       |             | √         |            |        |            |
| 67 | LCSA            | Linear combination-based search algorithm                                                      |        | √     | √    | √    |        |             | √     |             |           |            |        |            |
| 68 | LMEA            | Evolutionary algorithm for large-scale many-objective optimization                             |        | √     | √    | √    |        |             | √     |             |           |            |        |            |
| 69 | LMOCSSO         | Large-scale multi-objective competitive swarm optimization algorithm                           |        | √     | √    | √    |        |             | √     | √           |           |            |        |            |
| 70 | LMOEA-DS        | Large-scale evolutionary multi-objective optimization assisted by directed sampling            |        | √     |      | √    |        |             | √     |             |           |            |        |            |
| 71 | LSMOF           | Large-scale multi-objective optimization framework with NSGA-II                                |        | √     |      | √    |        |             | √     |             |           |            |        |            |
| 72 | MaOEA-CSS       | Many-objective evolutionary algorithms based on coordinated selection                          |        | √     | √    | √    | √      | √           |       |             |           |            |        |            |
| 73 | MaOEA-DDFC      | Many-objective evolutionary algorithm based on directional diversity and favorable convergence |        | √     | √    | √    | √      | √           |       |             |           |            |        |            |
| 74 | MaOEA/IGD       | IGD based many-objective evolutionary algorithm                                                |        |       | √    | √    | √      | √           |       |             |           |            |        |            |
| 75 | MaOEA/IT        | Many-objective evolutionary algorithms based on an independent two-stage                       |        | √     | √    | √    |        |             |       | √           |           |            |        |            |
| 76 | MaOEA-R&D       | Many-objective evolutionary algorithm based on objective space reduction                       |        |       | √    | √    | √      | √           |       |             |           |            |        |            |
| 77 | MCEA/D          | Multiple classifiers-assisted evolutionary algorithm based on decomposition                    |        | √     | √    | √    |        |             |       |             | √         |            |        |            |
| 78 | MMOPSO          | MOPSO with multiple search strategies                                                          |        | √     |      | √    |        |             |       |             |           |            |        |            |
| 79 | MO_Ring_PSO_SCD | Multiobjective PSO using ring topology and special crowding distance                           |        | √     |      | √    |        |             |       |             |           | √          |        |            |
| 80 | MOCcell         | Cellular genetic algorithm                                                                     |        | √     |      | √    | √      | √           |       | √           |           |            |        |            |
| 81 | MO-CMA          | Multi-objective covariance matrix adaptation evolution strategy                                |        | √     |      | √    |        |             |       |             |           |            |        |            |
| 82 | MOEA/D          | Multiobjective evolutionary algorithm based on decomposition                                   |        | √     | √    | √    | √      | √           |       |             |           |            |        |            |
| 83 | MOEA/D-AWA      | MOEA/D with covariance matrix adaptation evolution strategy                                    |        | √     | √    | √    |        |             |       |             |           |            |        |            |
| 84 | MOEA/D-CMA      | MOEA/D with covariance matrix adaptation evolution strategy                                    |        | √     | √    | √    |        |             |       |             |           |            |        |            |
| 85 | MOEA/DD         | Many-objective evolutionary algorithm based on dominance and decomposition                     |        | √     | √    | √    | √      | √           |       | √           |           |            |        |            |
| 86 | MOEA/D-DAE      | MOEA/D with detect-and-escape strategy                                                         |        | √     |      | √    | √      | √           |       | √           |           |            |        |            |
| 87 | MOEA/D-DCWV     | MOEA/D with distribution control of weight vector set                                          |        | √     | √    | √    | √      | √           |       |             |           |            |        |            |
| 88 | MOEA/D-DE       | MOEA/D based on differential evolution                                                         |        | √     | √    | √    |        |             |       |             |           |            |        |            |
| 89 | MOEA/D-DRA      | MOEA/D with dynamical resource allocation                                                      |        | √     | √    | √    |        |             |       |             |           |            |        |            |
| 90 | MOEA/D-DU       | MOEA/D with a distance based updating strategy                                                 |        | √     | √    | √    | √      | √           |       |             |           |            |        |            |
| 91 | MOEA/D-DYTS     | MOEA/D with fitness-rate-rank-based multiarmed bandit                                          |        | √     | √    | √    |        |             |       |             |           |            |        |            |

|     | Abbreviation       | Full name                                                                    | single | multi | many | real | binary | permutation | large | constrained | expensive | multimodal | sparse | preference |
|-----|--------------------|------------------------------------------------------------------------------|--------|-------|------|------|--------|-------------|-------|-------------|-----------|------------|--------|------------|
| 92  | MOEA/D-EGO         | MOEA/D with efficient global optimization                                    |        | √     |      | √    |        |             |       |             | √         |            |        |            |
| 93  | MOEA/D-FRRMAB      | MOEA/D with fitness-rate-rank-based multiarmed bandit                        |        | √     | √    | √    |        |             |       |             |           |            |        |            |
| 94  | MOEA/D-M2M         | MOEA/D based on MOP to MOP                                                   |        | √     |      | √    |        |             |       |             |           |            |        |            |
| 95  | MOEA/D-MRDL        | MOEA/D with maximum relative diversity loss                                  |        | √     |      | √    |        |             |       |             |           |            |        |            |
| 96  | MOEA/D-PaS         | MOEA/D with Pareto adaptive scalarizing approximation                        |        | √     | √    | √    |        |             |       |             |           |            |        |            |
| 97  | MOEA/D-PFE         | MOEA/D with Pareto front estimation                                          |        | √     | √    | √    | √      | √           |       |             |           |            |        |            |
| 98  | MOEA/D-STM         | MOEA/D with stable matching                                                  |        | √     | √    | √    |        |             |       |             |           |            |        |            |
| 99  | MOEA/D-UR          | MOEA/D with update when required                                             |        | √     | √    | √    | √      | √           |       |             |           |            |        |            |
| 100 | MOEA/D-URAW        | MOEA/D with uniform randomly adaptive weights                                |        | √     | √    | √    | √      | √           |       |             |           |            |        |            |
| 101 | MOEA/DVA           | Multi-objective evolutionary algorithm based on decision variable            |        | √     |      | √    |        |             | √     |             |           |            |        |            |
| 102 | MOEA/D-VOV         | MOEA/D with virtual objective vectors                                        |        | √     | √    | √    | √      | √           |       |             |           |            |        |            |
| 103 | MOEA/IGD-NS        | Multi-objective evolutionary algorithm based on an enhanced IGD              |        | √     |      | √    | √      | √           |       |             |           |            |        |            |
| 104 | MOEA-PC            | Multiobjective evolutionary algorithm based on polar coordinates             |        | √     |      | √    |        |             |       |             |           |            |        |            |
| 105 | MOEA/PSL           | Multi-objective evolutionary algorithm based on Pareto optimal subspace      |        | √     |      | √    | √      |             | √     | √           |           |            | √      |            |
| 106 | MOMBI-II           | Many objective metaheuristic based on the R2 indicator II                    |        | √     | √    | √    | √      | √           |       |             |           |            |        |            |
| 107 | MOPSO              | Multi-objective particle swarm optimization                                  |        | √     |      | √    |        |             |       |             |           |            |        |            |
| 108 | MOPSO-CD           | MOPSO with crowding distance                                                 |        | √     |      | √    |        |             |       |             |           |            |        |            |
| 109 | M-PAES             | Memetic algorithm with Pareto archived evolution strategy                    |        | √     |      | √    |        |             |       |             |           |            |        |            |
| 110 | MP-MMEA            | Multi-population multi-modal multi-objective evolutionary algorithm          |        | √     |      | √    |        |             | √     |             |           | √          | √      |            |
| 111 | MPSO/D             | Multi-objective particle swarm optimization algorithm based on decomposition |        | √     | √    | √    |        |             |       |             |           |            |        |            |
| 112 | MSCMO              | Multi-stage constrained multi-objective evolutionary algorithm               |        | √     |      | √    | √      | √           |       | √           |           |            |        |            |
| 113 | MSEA               | Multi-stage multi-objective evolutionary algorithm                           |        | √     |      | √    | √      | √           |       |             |           |            |        |            |
| 114 | MSOPS-II           | Multiple single objective Pareto sampling II                                 |        | √     | √    | √    |        |             |       | √           |           |            |        |            |
| 115 | MTS                | Multiple trajectory search                                                   |        | √     |      | √    |        |             |       |             |           |            |        |            |
| 116 | MultiObjective EGO | Multi-objective efficient global optimization                                |        | √     |      | √    |        |             |       | √           | √         |            |        |            |
| 117 | MyO-DEMR           | Many-objective differential evolution with mutation restriction              |        | √     | √    | √    |        |             |       |             |           |            |        |            |
| 118 | NelderMead         | The Nelder-Mead algorithm                                                    | √      |       |      | √    |        |             |       |             |           |            |        |            |
| 119 | NMPSO              | Novel multi-objective particle swarm optimization                            |        | √     | √    | √    |        |             |       |             |           |            |        |            |
| 120 | NNIA               | Nondominated neighbor immune algorithm                                       |        | √     |      | √    | √      | √           |       |             |           |            |        |            |
| 121 | NSGA-II            | Nondominated sorting genetic algorithm II                                    |        | √     |      | √    | √      | √           |       | √           |           |            |        |            |
| 122 | NSGA-II+ARSBX      | NSGA-II with adaptive rotation based simulated binary crossover              |        | √     |      | √    |        |             |       | √           |           |            |        |            |
| 123 | NSGA-II-conflict   | NSGA-II with conflict-based partitioning strategy                            |        |       | √    | √    | √      | √           |       |             |           |            |        |            |

|     | Abbreviation  | Full name                                                                            | single | multi | many | real | binary | permutation | large | constrained | expensive | multimodal | sparse | preference |
|-----|---------------|--------------------------------------------------------------------------------------|--------|-------|------|------|--------|-------------|-------|-------------|-----------|------------|--------|------------|
| 124 | NSGA-III      | Nondominated sorting genetic algorithm III                                           |        | √     | √    | √    | √      | √           |       | √           |           |            |        |            |
| 125 | NSGA-II/SDR   | NSGA-II with strengthened dominance relation                                         |        |       | √    | √    | √      | √           |       |             |           |            |        |            |
| 126 | NSLS          | Multiobjective optimization framework based on nondominated sorting and local search |        | √     |      | √    |        |             |       |             |           |            |        |            |
| 127 | OFA           | Optimal foraging algorithm                                                           | √      |       |      | √    |        |             | √     | √           |           |            |        |            |
| 128 | one-by-one EA | Many-objective evolutionary algorithm using a one-by-one selection                   |        | √     | √    | √    | √      | √           |       |             |           |            |        |            |
| 129 | OSP-NSDE      | Non-dominated sorting differential evolution with prediction in the objective space  |        | √     |      | √    |        |             |       |             |           |            |        |            |
| 130 | ParEGO        | Efficient global optimization for Pareto optimization                                |        | √     |      | √    |        |             |       |             | √         |            |        |            |
| 131 | PB-NSGA-III   | NSGA-III based on Pareto based bi-indicator infill sampling criterion                |        | √     | √    | √    |        |             |       |             | √         |            |        |            |
| 132 | PB-RVEA       | RVEA based on Pareto based bi-indicator infill sampling criterion                    |        | √     | √    | √    |        |             |       |             | √         |            |        |            |
| 133 | PeEA          | Pareto front shape estimation based evolutionary algorithm                           |        | √     | √    | √    | √      | √           |       |             |           |            |        |            |
| 134 | PESA-II       | Pareto envelope-based selection algorithm II                                         |        | √     |      | √    | √      | √           |       |             |           |            |        |            |
| 135 | PICEA-g       | Preference-inspired coevolutionary algorithm with goals                              |        | √     | √    | √    | √      | √           |       |             |           |            |        |            |
| 136 | PM-MOEA       | Pattern mining based multi-objective evolutionary algorithm                          |        | √     |      | √    |        |             | √     | √           |           |            |        |            |
| 137 | POCEA         | Paired offspring generation based constrained evolutionary algorithm                 |        | √     |      | √    |        |             | √     | √           |           |            |        |            |
| 138 | PPS           | Push and pull search algorithm                                                       |        | √     | √    | √    |        |             |       | √           |           |            |        |            |
| 139 | PREA          | Promising-region based EMO algorithm                                                 |        | √     | √    | √    | √      | √           |       |             |           |            |        |            |
| 140 | PSO           | Particle swarm optimization                                                          | √      |       |      | √    |        |             | √     | √           |           |            |        |            |
| 141 | RM-MEDA       | Regularity model-based multiobjective estimation of distribution                     |        | √     |      | √    |        |             |       |             |           |            |        |            |
| 142 | RMSProp       | Root mean square propagation                                                         | √      |       |      | √    |        |             | √     |             |           |            |        |            |
| 143 | r-NSGA-II     | r-dominance based NSGA-II                                                            |        | √     |      | √    | √      | √           |       |             |           |            |        | √          |
| 144 | RPD-NSGA-II   | Reference point dominance-based NSGA-II                                              |        | √     | √    | √    | √      | √           |       |             |           |            |        |            |
| 145 | RPEA          | Reference points-based evolutionary algorithm                                        |        |       | √    | √    | √      | √           |       |             |           |            |        |            |
| 146 | RSEA          | Radial space division based evolutionary algorithm                                   |        | √     | √    | √    | √      | √           |       |             |           |            |        |            |
| 147 | RVEA          | Reference vector guided evolutionary algorithm                                       |        | √     | √    | √    | √      | √           |       | √           |           |            |        |            |
| 148 | RVEAa         | RVEA embedded with the reference vector regeneration strategy                        |        |       | √    | √    | √      | √           |       |             |           |            |        |            |
| 149 | RVEA-iGNG     | RVEA based on improved growing neural gas                                            |        | √     | √    | √    | √      | √           |       |             |           |            |        |            |
| 150 | S3-CMA-ES     | Scalable small subpopulations based covariance matrix adaptation                     |        | √     | √    | √    |        |             | √     |             |           |            |        |            |
| 151 | SA            | Simulated annealing                                                                  | √      |       |      | √    |        |             | √     | √           |           |            |        |            |
| 152 | SACC-EAM-II   | Surrogate-assisted cooperative co-evolutionary algorithm of Minamo                   | √      |       |      | √    |        |             |       |             | √         |            |        |            |
| 153 | SACOSO        | Surrogate-assisted cooperative swarm optimization                                    | √      |       |      | √    |        |             | √     |             | √         |            |        |            |
| 154 | SADE-Sammon   | Sammon mapping assisted differential evolution                                       | √      |       |      | √    |        |             |       |             | √         |            |        |            |
| 155 | SAMSO         | Multiswarm-assisted expensive optimization                                           | √      |       |      | √    |        |             | √     |             | √         |            |        |            |
| 156 | S-CDAS        | Self-controlling dominance area of solutions                                         |        |       | √    | √    | √      | √           |       |             |           |            |        |            |

|     | Abbreviation | Full name                                                                  | single | multi | many | real | binary | permutation | large | constrained | expensive | multimodal | sparse | preference |
|-----|--------------|----------------------------------------------------------------------------|--------|-------|------|------|--------|-------------|-------|-------------|-----------|------------|--------|------------|
| 157 | SD           | Steepest descent                                                           | √      |       |      | √    |        |             | √     |             |           |            |        |            |
| 158 | SHADE        | Success-history based adaptive differential evolution                      | √      |       |      | √    |        |             | √     | √           |           |            |        |            |
| 159 | SIBEA        | Simple indicator-based evolutionary algorithm                              |        | √     |      | √    | √      | √           |       |             |           |            |        |            |
| 160 | SIBEA-kEMOSS | SIBEA with minimum objective subset of size k with minimum error           |        |       | √    | √    | √      | √           |       |             |           |            |        |            |
| 161 | SLMEA        | Super-large-scale multi-objective evolutionary algorithm                   |        | √     |      | √    | √      |             | √     | √           |           |            | √      |            |
| 162 | SMEA         | Self-organizing multiobjective evolutionary algorithm                      |        | √     |      | √    |        |             |       |             |           |            |        |            |
| 163 | SMPSO        | Speed-constrained multi-objective particle swarm optimization              |        | √     |      | √    |        |             |       |             |           |            |        |            |
| 164 | SMS-EGO      | S metric selection based efficient global optimization                     |        | √     |      | √    |        |             |       |             | √         |            |        |            |
| 165 | SMS-EMOA     | S metric selection based evolutionary multiobjective optimization          |        | √     |      | √    | √      | √           |       |             |           |            |        |            |
| 166 | SparseEA     | Evolutionary algorithm for sparse multi-objective optimization problems    |        | √     |      | √    | √      |             | √     | √           |           |            | √      |            |
| 167 | SparseEA2    | Improved SparseEA                                                          |        | √     |      | √    | √      |             | √     | √           |           |            | √      |            |
| 168 | SPEA2        | Strength Pareto evolutionary algorithm 2                                   |        | √     |      | √    | √      | √           |       |             |           |            |        |            |
| 169 | SPEA2+SDE    | SPEA2 with shift-based density estimation                                  |        |       | √    | √    | √      | √           |       |             |           |            |        |            |
| 170 | SPEA/R       | Strength Pareto evolutionary algorithm based on reference direction        |        | √     | √    | √    | √      | √           |       |             |           |            |        |            |
| 171 | SQP          | Sequential quadratic programming                                           | √      |       |      | √    |        |             | √     | √           |           |            |        |            |
| 172 | SRA          | Stochastic ranking algorithm                                               |        |       | √    | √    | √      | √           |       |             |           |            |        |            |
| 173 | t-DEA        | theta-dominance based evolutionary algorithm                               |        | √     | √    | √    | √      | √           |       |             |           |            |        |            |
| 174 | TiGE-2       | Tri-Goal Evolution Framework for CMaOPs                                    |        |       | √    | √    | √      | √           |       | √           |           |            |        |            |
| 175 | ToP          | Two-phase framework with NSGA-II                                           |        | √     |      | √    |        |             |       | √           |           |            |        |            |
| 176 | TriMOEA-TA&R | Multi-modal MOEA using two-archive and recombination strategies            |        | √     |      | √    |        |             |       |             |           | √          |        |            |
| 177 | Two_Arch2    | Two-archive algorithm 2                                                    |        | √     | √    | √    | √      | √           |       |             |           |            |        |            |
| 178 | VaEA         | Vector angle based evolutionary algorithm                                  |        | √     | √    | √    | √      | √           |       |             |           |            |        |            |
| 179 | WOF          | Weighted optimization framework                                            |        | √     |      | √    |        |             | √     |             |           |            |        |            |
| 180 | WV-MOEA-P    | Weight vector based multi-objective optimization algorithm with preference |        | √     |      | √    |        |             |       |             |           |            |        | √          |

## VI. List of Problems

|    | Abbreviation | Full name                                           | single | multi | many | real | binary | permutation | large | constrained | expensive | multimodal | sparse | preference |
|----|--------------|-----------------------------------------------------|--------|-------|------|------|--------|-------------|-------|-------------|-----------|------------|--------|------------|
| 1  | BT1          | Benchmark MOP with bias feature                     |        | √     |      | √    |        |             | √     |             |           |            |        |            |
| 2  | BT2          | Benchmark MOP with bias feature                     |        | √     |      | √    |        |             | √     |             |           |            |        |            |
| 3  | BT3          | Benchmark MOP with bias feature                     |        | √     |      | √    |        |             | √     |             |           |            |        |            |
| 4  | BT4          | Benchmark MOP with bias feature                     |        | √     |      | √    |        |             | √     |             |           |            |        |            |
| 5  | BT5          | Benchmark MOP with bias feature                     |        | √     |      | √    |        |             | √     |             |           |            |        |            |
| 6  | BT6          | Benchmark MOP with bias feature                     |        | √     |      | √    |        |             | √     |             |           |            |        |            |
| 7  | BT7          | Benchmark MOP with bias feature                     |        | √     |      | √    |        |             | √     |             |           |            |        |            |
| 8  | BT8          | Benchmark MOP with bias feature                     |        | √     |      | √    |        |             | √     |             |           |            |        |            |
| 9  | BT9          | Benchmark MOP with bias feature                     |        | √     |      | √    |        |             | √     |             |           |            |        |            |
| 10 | CEC2008_F1   | Shifted sphere function                             | √      |       |      | √    |        |             | √     |             | √         |            |        |            |
| 11 | CEC2008_F2   | Shifted Schwefel's function                         | √      |       |      | √    |        |             | √     |             | √         |            |        |            |
| 12 | CEC2008_F3   | Shifted Rosenbrock's function                       | √      |       |      | √    |        |             | √     |             | √         |            |        |            |
| 13 | CEC2008_F4   | Shifted Rastrign's function                         | √      |       |      | √    |        |             | √     |             | √         |            |        |            |
| 14 | CEC2008_F5   | Shifted Griewank's function                         | √      |       |      | √    |        |             | √     |             | √         |            |        |            |
| 15 | CEC2008_F6   | Shifted Ackley's function                           | √      |       |      | √    |        |             | √     |             | √         |            |        |            |
| 16 | CEC2008_F7   | FastFractal 'DoubleDip' function                    | √      |       |      | √    |        |             | √     |             | √         |            |        |            |
| 17 | CEC2010_F1   | CEC'2010 constrained optimization benchmark problem | √      |       |      | √    |        |             |       | √           |           |            |        |            |
| 18 | CEC2010_F2   | CEC'2010 constrained optimization benchmark problem | √      |       |      | √    |        |             |       | √           |           |            |        |            |
| 19 | CEC2010_F3   | CEC'2010 constrained optimization benchmark problem | √      |       |      | √    |        |             |       | √           |           |            |        |            |
| 20 | CEC2010_F4   | CEC'2010 constrained optimization benchmark problem | √      |       |      | √    |        |             |       | √           |           |            |        |            |
| 21 | CEC2010_F5   | CEC'2010 constrained optimization benchmark problem | √      |       |      | √    |        |             |       | √           |           |            |        |            |
| 22 | CEC2010_F6   | CEC'2010 constrained optimization benchmark problem | √      |       |      | √    |        |             |       | √           |           |            |        |            |
| 23 | CEC2010_F7   | CEC'2010 constrained optimization benchmark problem | √      |       |      | √    |        |             |       | √           |           |            |        |            |
| 24 | CEC2010_F8   | CEC'2010 constrained optimization benchmark problem | √      |       |      | √    |        |             |       | √           |           |            |        |            |
| 25 | CEC2010_F9   | CEC'2010 constrained optimization benchmark problem | √      |       |      | √    |        |             |       | √           |           |            |        |            |
| 26 | CEC2010_F10  | CEC'2010 constrained optimization benchmark problem | √      |       |      | √    |        |             |       | √           |           |            |        |            |
| 27 | CEC2010_F11  | CEC'2010 constrained optimization benchmark problem | √      |       |      | √    |        |             |       | √           |           |            |        |            |
| 28 | CEC2010_F12  | CEC'2010 constrained optimization benchmark problem | √      |       |      | √    |        |             |       | √           |           |            |        |            |
| 29 | CEC2010_F13  | CEC'2010 constrained optimization benchmark problem | √      |       |      | √    |        |             |       | √           |           |            |        |            |
| 30 | CEC2010_F14  | CEC'2010 constrained optimization benchmark problem | √      |       |      | √    |        |             |       | √           |           |            |        |            |
| 31 | CEC2010_F15  | CEC'2010 constrained optimization benchmark problem | √      |       |      | √    |        |             |       | √           |           |            |        |            |
| 32 | CEC2010_F16  | CEC'2010 constrained optimization benchmark problem | √      |       |      | √    |        |             |       | √           |           |            |        |            |
| 33 | CEC2010_F17  | CEC'2010 constrained optimization benchmark problem | √      |       |      | √    |        |             |       | √           |           |            |        |            |

|    | Abbreviation | Full name                                                              | single | multi | many | real | binary | permutation | large | constrained | expensive | multimodal | sparse | preference |
|----|--------------|------------------------------------------------------------------------|--------|-------|------|------|--------|-------------|-------|-------------|-----------|------------|--------|------------|
| 34 | CEC2010_F18  | CEC'2010 constrained optimization benchmark problem                    | √      |       |      | √    |        |             |       | √           |           |            |        |            |
| 35 | CEC2013_F1   | Shifted elliptic function                                              | √      |       |      | √    |        |             | √     |             |           |            |        |            |
| 36 | CEC2013_F2   | Shifted Rastrigin's function                                           | √      |       |      | √    |        |             | √     |             |           |            |        |            |
| 37 | CEC2013_F3   | Shifted Ackley's function                                              | √      |       |      | √    |        |             | √     |             |           |            |        |            |
| 38 | CEC2013_F4   | 7-nonseparable, 1-separable shifted and rotated elliptic function      | √      |       |      | √    |        |             | √     |             |           |            |        |            |
| 39 | CEC2013_F5   | 7-nonseparable, 1-separable shifted and rotated Rastrigin's function   | √      |       |      | √    |        |             | √     |             |           |            |        |            |
| 40 | CEC2013_F6   | 7-nonseparable, 1-separable shifted and rotated Ackley's function      | √      |       |      | √    |        |             | √     |             |           |            |        |            |
| 41 | CEC2013_F7   | 7-nonseparable, 1-separable shifted and rotated Schwefel's function    | √      |       |      | √    |        |             | √     |             |           |            |        |            |
| 42 | CEC2013_F8   | 20-nonseparable shifted and rotated elliptic function                  | √      |       |      | √    |        |             | √     |             |           |            |        |            |
| 43 | CEC2013_F9   | 20-nonseparable shifted and rotated Rastrigin's function               | √      |       |      | √    |        |             | √     |             |           |            |        |            |
| 44 | CEC2013_F10  | 20-nonseparable shifted and rotated Rastrigin's function               | √      |       |      | √    |        |             | √     |             |           |            |        |            |
| 45 | CEC2013_F11  | 20-nonseparable shifted and rotated Schwefel's function                | √      |       |      | √    |        |             | √     |             |           |            |        |            |
| 46 | CEC2013_F12  | Shifted Rosenbrock's function                                          | √      |       |      | √    |        |             | √     |             |           |            |        |            |
| 47 | CEC2013_F13  | Shifted Schwefel's function with conforming overlapping subcomponents  | √      |       |      | √    |        |             | √     |             |           |            |        |            |
| 48 | CEC2013_F14  | Shifted Schwefel's function with conflicting overlapping subcomponents | √      |       |      | √    |        |             | √     |             |           |            |        |            |
| 49 | CEC2013_F15  | Shifted Schwefel's function                                            | √      |       |      | √    |        |             | √     |             |           |            |        |            |
| 50 | CEC2017_F1   | CEC'2017 constrained optimization benchmark problem                    | √      |       |      | √    |        |             |       | √           |           |            |        |            |
| 51 | CEC2017_F2   | CEC'2017 constrained optimization benchmark problem                    | √      |       |      | √    |        |             |       | √           |           |            |        |            |
| 52 | CEC2017_F3   | CEC'2017 constrained optimization benchmark problem                    | √      |       |      | √    |        |             |       | √           |           |            |        |            |
| 53 | CEC2017_F4   | CEC'2017 constrained optimization benchmark problem                    | √      |       |      | √    |        |             |       | √           |           |            |        |            |
| 54 | CEC2017_F5   | CEC'2017 constrained optimization benchmark problem                    | √      |       |      | √    |        |             |       | √           |           |            |        |            |
| 55 | CEC2017_F6   | CEC'2017 constrained optimization benchmark problem                    | √      |       |      | √    |        |             |       | √           |           |            |        |            |
| 56 | CEC2017_F7   | CEC'2017 constrained optimization benchmark problem                    | √      |       |      | √    |        |             |       | √           |           |            |        |            |
| 57 | CEC2017_F8   | CEC'2017 constrained optimization benchmark problem                    | √      |       |      | √    |        |             |       | √           |           |            |        |            |
| 58 | CEC2017_F9   | CEC'2017 constrained optimization benchmark problem                    | √      |       |      | √    |        |             |       | √           |           |            |        |            |
| 59 | CEC2017_F10  | CEC'2017 constrained optimization benchmark problem                    | √      |       |      | √    |        |             |       | √           |           |            |        |            |
| 60 | CEC2017_F11  | CEC'2017 constrained optimization benchmark problem                    | √      |       |      | √    |        |             |       | √           |           |            |        |            |
| 61 | CEC2017_F12  | CEC'2017 constrained optimization benchmark problem                    | √      |       |      | √    |        |             |       | √           |           |            |        |            |
| 62 | CEC2017_F13  | CEC'2017 constrained optimization benchmark problem                    | √      |       |      | √    |        |             |       | √           |           |            |        |            |
| 63 | CEC2017_F14  | CEC'2017 constrained optimization benchmark problem                    | √      |       |      | √    |        |             |       | √           |           |            |        |            |
| 64 | CEC2017_F15  | CEC'2017 constrained optimization benchmark problem                    | √      |       |      | √    |        |             |       | √           |           |            |        |            |
| 65 | CEC2017_F16  | CEC'2017 constrained optimization benchmark problem                    | √      |       |      | √    |        |             |       | √           |           |            |        |            |
| 66 | CEC2017_F17  | CEC'2017 constrained optimization benchmark problem                    | √      |       |      | √    |        |             |       | √           |           |            |        |            |
| 67 | CEC2017_F18  | CEC'2017 constrained optimization benchmark problem                    | √      |       |      | √    |        |             |       | √           |           |            |        |            |
| 68 | CEC2017_F19  | CEC'2017 constrained optimization benchmark problem                    | √      |       |      | √    |        |             |       | √           |           |            |        |            |
| 69 | CEC2017_F20  | CEC'2017 constrained optimization benchmark problem                    | √      |       |      | √    |        |             |       | √           |           |            |        |            |

|     | Abbreviation | Full name                                                    | single | multi | many | real | binary | permutation | large | constrained | expensive | multimodal | sparse | preference |
|-----|--------------|--------------------------------------------------------------|--------|-------|------|------|--------|-------------|-------|-------------|-----------|------------|--------|------------|
| 70  | CEC2017_F21  | CEC'2017 constrained optimization benchmark problem          | √      |       |      | √    |        |             |       | √           |           |            |        |            |
| 71  | CEC2017_F22  | CEC'2017 constrained optimization benchmark problem          | √      |       |      | √    |        |             |       | √           |           |            |        |            |
| 72  | CEC2017_F23  | CEC'2017 constrained optimization benchmark problem          | √      |       |      | √    |        |             |       | √           |           |            |        |            |
| 73  | CEC2017_F24  | CEC'2017 constrained optimization benchmark problem          | √      |       |      | √    |        |             |       | √           |           |            |        |            |
| 74  | CEC2017_F25  | CEC'2017 constrained optimization benchmark problem          | √      |       |      | √    |        |             |       | √           |           |            |        |            |
| 75  | CEC2017_F26  | CEC'2017 constrained optimization benchmark problem          | √      |       |      | √    |        |             |       | √           |           |            |        |            |
| 76  | CEC2017_F27  | CEC'2017 constrained optimization benchmark problem          | √      |       |      | √    |        |             |       | √           |           |            |        |            |
| 77  | CEC2017_F28  | CEC'2017 constrained optimization benchmark problem          | √      |       |      | √    |        |             |       | √           |           |            |        |            |
| 78  | CEC2020_F1   | Bent cigar function                                          | √      |       |      | √    |        |             |       |             |           |            |        |            |
| 79  | CEC2020_F2   | Shifted and rotated Schwefel's function                      | √      |       |      | √    |        |             |       |             |           |            |        |            |
| 80  | CEC2020_F3   | Shifted and rotated Lunacek bi-Rastrigin function            | √      |       |      | √    |        |             |       |             |           |            |        |            |
| 81  | CEC2020_F4   | Expanded Rosenbrock's plus Griewangk's function              | √      |       |      | √    |        |             |       |             |           |            |        |            |
| 82  | CEC2020_F5   | Hybrid function 1                                            | √      |       |      | √    |        |             |       |             |           |            |        |            |
| 83  | CEC2020_F6   | Hybrid function 2                                            | √      |       |      | √    |        |             |       |             |           |            |        |            |
| 84  | CEC2020_F7   | Hybrid function 3                                            | √      |       |      | √    |        |             |       |             |           |            |        |            |
| 85  | CEC2020_F8   | Composition function 1                                       | √      |       |      | √    |        |             |       |             |           |            |        |            |
| 86  | CEC2020_F9   | Composition function 2                                       | √      |       |      | √    |        |             |       |             |           |            |        |            |
| 87  | CEC2020_F10  | Composition function 3                                       | √      |       |      | √    |        |             |       |             |           |            |        |            |
| 88  | CF1          | Constrained benchmark MOP                                    |        | √     |      | √    |        |             | √     | √           |           |            |        |            |
| 89  | CF2          | Constrained benchmark MOP                                    |        | √     |      | √    |        |             | √     | √           |           |            |        |            |
| 90  | CF3          | Constrained benchmark MOP                                    |        | √     |      | √    |        |             | √     | √           |           |            |        |            |
| 91  | CF4          | Constrained benchmark MOP                                    |        | √     |      | √    |        |             | √     | √           |           |            |        |            |
| 92  | CF5          | Constrained benchmark MOP                                    |        | √     |      | √    |        |             | √     | √           |           |            |        |            |
| 93  | CF6          | Constrained benchmark MOP                                    |        | √     |      | √    |        |             | √     | √           |           |            |        |            |
| 94  | CF7          | Constrained benchmark MOP                                    |        | √     |      | √    |        |             | √     | √           |           |            |        |            |
| 95  | CF8          | Constrained benchmark MOP                                    |        | √     |      | √    |        |             | √     | √           |           |            |        |            |
| 96  | CF9          | Constrained benchmark MOP                                    |        | √     |      | √    |        |             | √     | √           |           |            |        |            |
| 97  | CF10         | Constrained benchmark MOP                                    |        | √     |      | √    |        |             | √     | √           |           |            |        |            |
| 98  | DAS-CMOP1    | Difficulty-adjustable and scalable constrained benchmark MOP |        | √     |      | √    |        |             | √     | √           |           |            |        |            |
| 99  | DAS-CMOP2    | Difficulty-adjustable and scalable constrained benchmark MOP |        | √     |      | √    |        |             | √     | √           |           |            |        |            |
| 100 | DAS-CMOP3    | Difficulty-adjustable and scalable constrained benchmark MOP |        | √     |      | √    |        |             | √     | √           |           |            |        |            |
| 101 | DAS-CMOP4    | Difficulty-adjustable and scalable constrained benchmark MOP |        | √     |      | √    |        |             | √     | √           |           |            |        |            |
| 102 | DAS-CMOP5    | Difficulty-adjustable and scalable constrained benchmark MOP |        | √     |      | √    |        |             | √     | √           |           |            |        |            |
| 103 | DAS-CMOP6    | Difficulty-adjustable and scalable constrained benchmark MOP |        | √     |      | √    |        |             | √     | √           |           |            |        |            |
| 104 | DAS-CMOP7    | Difficulty-adjustable and scalable constrained benchmark MOP |        | √     |      | √    |        |             | √     | √           |           |            |        |            |
| 105 | DAS-CMOP8    | Difficulty-adjustable and scalable constrained benchmark MOP |        | √     |      | √    |        |             | √     | √           |           |            |        |            |
| 106 | DAS-CMOP9    | Difficulty-adjustable and scalable constrained benchmark MOP |        | √     |      | √    |        |             | √     | √           |           |            |        |            |



|     | Abbreviation | Full name                                                       | single | multi | many | real | binary | permutation | large | constrained | expensive | multimodal | sparse | preference |
|-----|--------------|-----------------------------------------------------------------|--------|-------|------|------|--------|-------------|-------|-------------|-----------|------------|--------|------------|
| 107 | DOC1         | Benchmark MOP with constraints in decision and objective spaces |        | √     |      | √    |        |             |       | √           |           |            |        |            |
| 108 | DOC2         | Benchmark MOP with constraints in decision and objective spaces |        | √     |      | √    |        |             |       | √           |           |            |        |            |
| 109 | DOC3         | Benchmark MOP with constraints in decision and objective spaces |        | √     |      | √    |        |             |       | √           |           |            |        |            |
| 110 | DOC4         | Benchmark MOP with constraints in decision and objective spaces |        | √     |      | √    |        |             |       | √           |           |            |        |            |
| 111 | DOC5         | Benchmark MOP with constraints in decision and objective spaces |        | √     |      | √    |        |             |       | √           |           |            |        |            |
| 112 | DOC6         | Benchmark MOP with constraints in decision and objective spaces |        | √     |      | √    |        |             |       | √           |           |            |        |            |
| 113 | DOC7         | Benchmark MOP with constraints in decision and objective spaces |        | √     |      | √    |        |             |       | √           |           |            |        |            |
| 114 | DOC8         | Benchmark MOP with constraints in decision and objective spaces |        | √     |      | √    |        |             |       | √           |           |            |        |            |
| 115 | DOC9         | Benchmark MOP with constraints in decision and objective spaces |        | √     |      | √    |        |             |       | √           |           |            |        |            |
| 116 | DTLZ1        | Benchmark MOP proposed by Deb, Thiele, Laumanns, and Zitzler    |        | √     | √    | √    |        |             | √     |             | √         |            |        |            |
| 117 | DTLZ2        | Benchmark MOP proposed by Deb, Thiele, Laumanns, and Zitzler    |        | √     | √    | √    |        |             | √     |             | √         |            |        |            |
| 118 | DTLZ3        | Benchmark MOP proposed by Deb, Thiele, Laumanns, and Zitzler    |        | √     | √    | √    |        |             | √     |             | √         |            |        |            |
| 119 | DTLZ4        | Benchmark MOP proposed by Deb, Thiele, Laumanns, and Zitzler    |        | √     | √    | √    |        |             | √     |             | √         |            |        |            |
| 120 | DTLZ5        | Benchmark MOP proposed by Deb, Thiele, Laumanns, and Zitzler    |        | √     | √    | √    |        |             | √     |             | √         |            |        |            |
| 121 | DTLZ6        | Benchmark MOP proposed by Deb, Thiele, Laumanns, and Zitzler    |        | √     | √    | √    |        |             | √     |             | √         |            |        |            |
| 122 | DTLZ7        | Benchmark MOP proposed by Deb, Thiele, Laumanns, and Zitzler    |        | √     | √    | √    |        |             | √     |             | √         |            |        |            |
| 123 | DTLZ8        | Benchmark MOP proposed by Deb, Thiele, Laumanns, and Zitzler    |        | √     | √    | √    |        |             | √     | √           | √         |            |        |            |
| 124 | DTLZ9        | Benchmark MOP proposed by Deb, Thiele, Laumanns, and Zitzler    |        | √     | √    | √    |        |             | √     | √           | √         |            |        |            |
| 125 | CDTLZ2       | Convex DTLZ2                                                    |        | √     | √    | √    |        |             | √     |             | √         |            |        |            |
| 126 | IDTLZ1       | Inverted DTLZ1                                                  |        | √     | √    | √    |        |             | √     |             | √         |            |        |            |
| 127 | IDTLZ2       | Inverted DTLZ2                                                  |        | √     | √    | √    |        |             | √     |             | √         |            |        |            |
| 128 | SDTLZ1       | Scaled DTLZ1                                                    |        | √     | √    | √    |        |             | √     |             | √         |            |        |            |
| 129 | SDTLZ2       | Scaled DTLZ2                                                    |        | √     | √    | √    |        |             | √     |             | √         |            |        |            |
| 130 | C1-DTLZ1     | Constrained DTLZ1                                               |        | √     | √    | √    |        |             | √     | √           | √         |            |        |            |
| 131 | C1-DTLZ3     | Constrained DTLZ3                                               |        | √     | √    | √    |        |             | √     | √           | √         |            |        |            |
| 132 | C2-DTLZ2     | Constrained DTLZ2                                               |        | √     | √    | √    |        |             | √     | √           | √         |            |        |            |
| 133 | C3-DTLZ4     | Constrained DTLZ4                                               |        | √     | √    | √    |        |             | √     | √           | √         |            |        |            |
| 134 | DC1-DTLZ1    | DTLZ1 with constrains in decision space                         |        | √     | √    | √    |        |             | √     | √           | √         |            |        |            |
| 135 | DC1-DTLZ3    | DTLZ3 with constrains in decision space                         |        | √     | √    | √    |        |             | √     | √           | √         |            |        |            |
| 136 | DC2-DTLZ1    | DTLZ1 with constrains in decision space                         |        | √     | √    | √    |        |             | √     | √           | √         |            |        |            |
| 137 | DC2-DTLZ3    | DTLZ3 with constrains in decision space                         |        | √     | √    | √    |        |             | √     | √           | √         |            |        |            |
| 138 | DC3-DTLZ1    | DTLZ1 with constrains in decision space                         |        | √     | √    | √    |        |             | √     | √           | √         |            |        |            |
| 139 | DC3-DTLZ3    | DTLZ3 with constrains in decision space                         |        | √     | √    | √    |        |             | √     | √           | √         |            |        |            |
| 140 | FCP1         | Benchmark constrained MOP proposed by Yuan                      |        | √     |      | √    |        |             |       | √           |           |            |        |            |
| 141 | FCP2         | Benchmark constrained MOP proposed by Yuan                      |        | √     |      | √    |        |             |       | √           |           |            |        |            |
| 142 | FCP3         | Benchmark constrained MOP proposed by Yuan                      |        | √     |      | √    |        |             |       | √           |           |            |        |            |
| 143 | FCP4         | Benchmark constrained MOP proposed by Yuan                      |        | √     |      | √    |        |             |       | √           |           |            |        |            |



|     | Abbreviation | Full name                                               | single | multi | many | real | binary | permutation | large | constrained | expensive | multimodal | sparse | preference |
|-----|--------------|---------------------------------------------------------|--------|-------|------|------|--------|-------------|-------|-------------|-----------|------------|--------|------------|
| 144 | FCP5         | Benchmark constrained MOP proposed by Yuan              |        | √     |      | √    |        |             |       | √           |           |            |        |            |
| 145 | IMMOEA_F1    | Benchmark MOP for testing IM-MOEA                       |        | √     |      | √    |        |             | √     |             |           |            |        |            |
| 146 | IMMOEA_F2    | Benchmark MOP for testing IM-MOEA                       |        | √     |      | √    |        |             | √     |             |           |            |        |            |
| 147 | IMMOEA_F3    | Benchmark MOP for testing IM-MOEA                       |        | √     |      | √    |        |             | √     |             |           |            |        |            |
| 148 | IMMOEA_F4    | Benchmark MOP for testing IM-MOEA                       |        | √     |      | √    |        |             | √     |             |           |            |        |            |
| 149 | IMMOEA_F5    | Benchmark MOP for testing IM-MOEA                       |        | √     |      | √    |        |             | √     |             |           |            |        |            |
| 150 | IMMOEA_F6    | Benchmark MOP for testing IM-MOEA                       |        | √     |      | √    |        |             | √     |             |           |            |        |            |
| 151 | IMMOEA_F7    | Benchmark MOP for testing IM-MOEA                       |        | √     |      | √    |        |             | √     |             |           |            |        |            |
| 152 | IMMOEA_F8    | Benchmark MOP for testing IM-MOEA                       |        | √     |      | √    |        |             | √     |             |           |            |        |            |
| 153 | IMMOEA_F9    | Benchmark MOP for testing IM-MOEA                       |        | √     |      | √    |        |             | √     |             |           |            |        |            |
| 154 | IMMOEA_F10   | Benchmark MOP for testing IM-MOEA                       |        | √     |      | √    |        |             | √     |             |           |            |        |            |
| 155 | IMOP1        | Benchmark MOP with irregular Pareto front               |        | √     |      | √    |        |             |       |             | √         |            |        |            |
| 156 | IMOP2        | Benchmark MOP with irregular Pareto front               |        | √     |      | √    |        |             |       |             | √         |            |        |            |
| 157 | IMOP3        | Benchmark MOP with irregular Pareto front               |        | √     |      | √    |        |             |       |             | √         |            |        |            |
| 158 | IMOP4        | Benchmark MOP with irregular Pareto front               |        | √     |      | √    |        |             |       |             | √         |            |        |            |
| 159 | IMOP5        | Benchmark MOP with irregular Pareto front               |        | √     |      | √    |        |             |       |             | √         |            |        |            |
| 160 | IMOP6        | Benchmark MOP with irregular Pareto front               |        | √     |      | √    |        |             |       |             | √         |            |        |            |
| 161 | IMOP7        | Benchmark MOP with irregular Pareto front               |        | √     |      | √    |        |             |       |             | √         |            |        |            |
| 162 | IMOP8        | Benchmark MOP with irregular Pareto front               |        | √     |      | √    |        |             |       |             | √         |            |        |            |
| 163 | KP           | The knapsack problem                                    | √      |       |      |      | √      |             | √     | √           |           |            |        |            |
| 164 | LIR-CMOP1    | Constrained benchmark MOP with large infeasible regions |        | √     |      | √    |        |             | √     | √           |           |            |        |            |
| 165 | LIR-CMOP2    | Constrained benchmark MOP with large infeasible regions |        | √     |      | √    |        |             | √     | √           |           |            |        |            |
| 166 | LIR-CMOP3    | Constrained benchmark MOP with large infeasible regions |        | √     |      | √    |        |             | √     | √           |           |            |        |            |
| 167 | LIR-CMOP4    | Constrained benchmark MOP with large infeasible regions |        | √     |      | √    |        |             | √     | √           |           |            |        |            |
| 168 | LIR-CMOP5    | Constrained benchmark MOP with large infeasible regions |        | √     |      | √    |        |             | √     | √           |           |            |        |            |
| 169 | LIR-CMOP6    | Constrained benchmark MOP with large infeasible regions |        | √     |      | √    |        |             | √     | √           |           |            |        |            |
| 170 | LIR-CMOP7    | Constrained benchmark MOP with large infeasible regions |        | √     |      | √    |        |             | √     | √           |           |            |        |            |
| 171 | LIR-CMOP8    | Constrained benchmark MOP with large infeasible regions |        | √     |      | √    |        |             | √     | √           |           |            |        |            |
| 172 | LIR-CMOP9    | Constrained benchmark MOP with large infeasible regions |        | √     |      | √    |        |             | √     | √           |           |            |        |            |
| 173 | LIR-CMOP10   | Constrained benchmark MOP with large infeasible regions |        | √     |      | √    |        |             | √     | √           |           |            |        |            |
| 174 | LIR-CMOP11   | Constrained benchmark MOP with large infeasible regions |        | √     |      | √    |        |             | √     | √           |           |            |        |            |
| 175 | LIR-CMOP12   | Constrained benchmark MOP with large infeasible regions |        | √     |      | √    |        |             | √     | √           |           |            |        |            |
| 176 | LIR-CMOP13   | Constrained benchmark MOP with large infeasible regions |        | √     |      | √    |        |             | √     | √           |           |            |        |            |
| 177 | LIR-CMOP14   | Constrained benchmark MOP with large infeasible regions |        | √     |      | √    |        |             | √     | √           |           |            |        |            |
| 178 | LSMOP1       | Large-scale benchmark MOP                               |        | √     | √    | √    |        |             | √     |             |           |            |        |            |
| 179 | LSMOP2       | Large-scale benchmark MOP                               |        | √     | √    | √    |        |             | √     |             |           |            |        |            |
| 180 | LSMOP3       | Large-scale benchmark MOP                               |        | √     | √    | √    |        |             | √     |             |           |            |        |            |

|     | Abbreviation | Full name                                        | single | multi | many | real | binary | permutation | large | constrained | expensive | multimodal | sparse | preference |
|-----|--------------|--------------------------------------------------|--------|-------|------|------|--------|-------------|-------|-------------|-----------|------------|--------|------------|
| 181 | LSMOP4       | Large-scale benchmark MOP                        |        | √     | √    | √    |        |             | √     |             |           |            |        |            |
| 182 | LSMOP5       | Large-scale benchmark MOP                        |        | √     | √    | √    |        |             | √     |             |           |            |        |            |
| 183 | LSMOP6       | Large-scale benchmark MOP                        |        | √     | √    | √    |        |             | √     |             |           |            |        |            |
| 184 | LSMOP7       | Large-scale benchmark MOP                        |        | √     | √    | √    |        |             | √     |             |           |            |        |            |
| 185 | LSMOP8       | Large-scale benchmark MOP                        |        | √     | √    | √    |        |             | √     |             |           |            |        |            |
| 186 | LSMOP9       | Large-scale benchmark MOP                        |        | √     | √    | √    |        |             | √     |             |           |            |        |            |
| 187 | MaF1         | Inverted DTLZ1                                   |        | √     | √    | √    |        |             | √     |             |           |            |        |            |
| 188 | MaF2         | DTLZ2BZ                                          |        | √     | √    | √    |        |             | √     |             |           |            |        |            |
| 189 | MaF3         | Convex DTLZ3                                     |        | √     | √    | √    |        |             | √     |             |           |            |        |            |
| 190 | MaF4         | Inverted and scaled DTLZ3                        |        | √     | √    | √    |        |             | √     |             |           |            |        |            |
| 191 | MaF5         | Scaled DTLZ4                                     |        | √     | √    | √    |        |             | √     |             |           |            |        |            |
| 192 | MaF6         | DTLZ5IM                                          |        | √     | √    | √    |        |             | √     |             |           |            |        |            |
| 193 | MaF7         | DTLZ7                                            |        | √     | √    | √    |        |             | √     |             |           |            |        |            |
| 194 | MaF8         | MP-DMP                                           |        | √     | √    | √    |        |             |       |             |           |            |        |            |
| 195 | MaF9         | ML-DMP                                           |        | √     | √    | √    |        |             |       |             |           |            |        |            |
| 196 | MaF10        | WFG1                                             |        | √     | √    | √    |        |             | √     |             |           |            |        |            |
| 197 | MaF11        | WFG2                                             |        | √     | √    | √    |        |             | √     |             |           |            |        |            |
| 198 | MaF12        | WFG9                                             |        | √     | √    | √    |        |             | √     |             |           |            |        |            |
| 199 | MaF13        | P7                                               |        | √     | √    | √    |        |             | √     |             |           |            |        |            |
| 200 | MaF14        | LSMOP3                                           |        | √     | √    | √    |        |             | √     |             |           |            |        |            |
| 201 | MaF15        | Inverted LSMOP8                                  |        | √     | √    | √    |        |             | √     |             |           |            |        |            |
| 202 | MLDMP        | The multi-line distance minimization problem     |        | √     | √    | √    |        |             |       |             |           |            |        |            |
| 203 | MMF1         | Multi-modal multi-objective test function        |        | √     |      | √    |        |             |       |             |           | √          |        |            |
| 204 | MMF2         | Multi-modal multi-objective test function        |        | √     |      | √    |        |             |       |             |           | √          |        |            |
| 205 | MMF3         | Multi-modal multi-objective test function        |        | √     |      | √    |        |             |       |             |           | √          |        |            |
| 206 | MMF4         | Multi-modal multi-objective test function        |        | √     |      | √    |        |             |       |             |           | √          |        |            |
| 207 | MMF5         | Multi-modal multi-objective test function        |        | √     |      | √    |        |             |       |             |           | √          |        |            |
| 208 | MMF6         | Multi-modal multi-objective test function        |        | √     |      | √    |        |             |       |             |           | √          |        |            |
| 209 | MMF7         | Multi-modal multi-objective test function        |        | √     |      | √    |        |             |       |             |           | √          |        |            |
| 210 | MMF8         | Multi-modal multi-objective test function        |        | √     |      | √    |        |             |       |             |           | √          |        |            |
| 211 | MMMOP1       | Multi-modal multi-objective optimization problem |        | √     | √    | √    |        |             |       |             |           | √          |        |            |
| 212 | MMMOP2       | Multi-modal multi-objective optimization problem |        | √     | √    | √    |        |             |       |             |           | √          |        |            |
| 213 | MMMOP3       | Multi-modal multi-objective optimization problem |        | √     | √    | √    |        |             |       |             |           | √          |        |            |
| 214 | MMMOP4       | Multi-modal multi-objective optimization problem |        | √     | √    | √    |        |             |       |             |           | √          |        |            |
| 215 | MMMOP5       | Multi-modal multi-objective optimization problem |        | √     | √    | √    |        |             |       |             |           | √          |        |            |
| 216 | MMMOP6       | Multi-modal multi-objective optimization problem |        | √     | √    | √    |        |             |       |             |           | √          |        |            |
| 217 | MOEADDE_F1   | Benchmark MOP for testing MOEA/D-DE              |        | √     |      | √    |        |             | √     |             |           |            |        |            |

|     | Abbreviation | Full name                                         | single | multi | many | real | binary | permutation | large | constrained | expensive | multimodal | sparse | preference |
|-----|--------------|---------------------------------------------------|--------|-------|------|------|--------|-------------|-------|-------------|-----------|------------|--------|------------|
| 218 | MOEADDE_F2   | Benchmark MOP for testing MOEA/D-DE               |        | √     |      | √    |        |             | √     |             |           |            |        |            |
| 219 | MOEADDE_F3   | Benchmark MOP for testing MOEA/D-DE               |        | √     |      | √    |        |             | √     |             |           |            |        |            |
| 220 | MOEADDE_F4   | Benchmark MOP for testing MOEA/D-DE               |        | √     |      | √    |        |             | √     |             |           |            |        |            |
| 221 | MOEADDE_F5   | Benchmark MOP for testing MOEA/D-DE               |        | √     |      | √    |        |             | √     |             |           |            |        |            |
| 222 | MOEADDE_F6   | Benchmark MOP for testing MOEA/D-DE               |        | √     |      | √    |        |             | √     |             |           |            |        |            |
| 223 | MOEADDE_F7   | Benchmark MOP for testing MOEA/D-DE               |        | √     |      | √    |        |             | √     |             |           |            |        |            |
| 224 | MOEADDE_F8   | Benchmark MOP for testing MOEA/D-DE               |        | √     |      | √    |        |             | √     |             |           |            |        |            |
| 225 | MOEADDE_F9   | Benchmark MOP for testing MOEA/D-DE               |        | √     |      | √    |        |             | √     |             |           |            |        |            |
| 226 | MOEADM2M_F1  | Benchmark MOP for testing MOEA/D-M2M              |        | √     |      | √    |        |             | √     |             |           |            |        |            |
| 227 | MOEADM2M_F2  | Benchmark MOP for testing MOEA/D-M2M              |        | √     |      | √    |        |             | √     |             |           |            |        |            |
| 228 | MOEADM2M_F3  | Benchmark MOP for testing MOEA/D-M2M              |        | √     |      | √    |        |             | √     |             |           |            |        |            |
| 229 | MOEADM2M_F4  | Benchmark MOP for testing MOEA/D-M2M              |        | √     |      | √    |        |             | √     |             |           |            |        |            |
| 230 | MOEADM2M_F5  | Benchmark MOP for testing MOEA/D-M2M              |        | √     |      | √    |        |             | √     |             |           |            |        |            |
| 231 | MOEADM2M_F6  | Benchmark MOP for testing MOEA/D-M2M              |        | √     |      | √    |        |             | √     |             |           |            |        |            |
| 232 | MOEADM2M_F7  | Benchmark MOP for testing MOEA/D-M2M              |        | √     |      | √    |        |             | √     |             |           |            |        |            |
| 233 | MOKP         | The multi-objective knapsack problem              |        | √     | √    |      | √      |             | √     |             |           |            |        |            |
| 234 | MONRP        | The multi-objective next release problem          |        | √     |      |      | √      |             | √     |             |           |            |        |            |
| 235 | MOTSP        | The multi-objective traveling salesman problem    |        | √     | √    |      |        | √           | √     |             |           |            |        |            |
| 236 | MPDMP        | The multi-point distance minimization problem     |        | √     | √    | √    |        |             |       |             |           |            |        |            |
| 237 | mQAP         | The multi-objective quadratic assignment problem  |        | √     | √    |      |        | √           | √     |             |           |            |        |            |
| 238 | MW1          | Constrained benchmark MOP proposed by Ma and Wang |        | √     |      | √    |        |             | √     | √           |           |            |        |            |
| 239 | MW2          | Constrained benchmark MOP proposed by Ma and Wang |        | √     |      | √    |        |             | √     | √           |           |            |        |            |
| 240 | MW3          | Constrained benchmark MOP proposed by Ma and Wang |        | √     |      | √    |        |             | √     | √           |           |            |        |            |
| 241 | MW4          | Constrained benchmark MOP proposed by Ma and Wang |        | √     | √    | √    |        |             | √     | √           |           |            |        |            |
| 242 | MW5          | Constrained benchmark MOP proposed by Ma and Wang |        | √     |      | √    |        |             | √     | √           |           |            |        |            |
| 243 | MW6          | Constrained benchmark MOP proposed by Ma and Wang |        | √     |      | √    |        |             | √     | √           |           |            |        |            |
| 244 | MW7          | Constrained benchmark MOP proposed by Ma and Wang |        | √     |      | √    |        |             | √     | √           |           |            |        |            |
| 245 | MW8          | Constrained benchmark MOP proposed by Ma and Wang |        | √     | √    | √    |        |             | √     | √           |           |            |        |            |
| 246 | MW9          | Constrained benchmark MOP proposed by Ma and Wang |        | √     |      | √    |        |             | √     | √           |           |            |        |            |
| 247 | MW10         | Constrained benchmark MOP proposed by Ma and Wang |        | √     |      | √    |        |             | √     | √           |           |            |        |            |
| 248 | MW11         | Constrained benchmark MOP proposed by Ma and Wang |        | √     |      | √    |        |             | √     | √           |           |            |        |            |
| 249 | MW12         | Constrained benchmark MOP proposed by Ma and Wang |        | √     |      | √    |        |             | √     | √           |           |            |        |            |
| 250 | MW13         | Constrained benchmark MOP proposed by Ma and Wang |        | √     |      | √    |        |             | √     | √           |           |            |        |            |
| 251 | MW14         | Constrained benchmark MOP proposed by Ma and Wang |        | √     | √    | √    |        |             | √     | √           |           |            |        |            |
| 252 | RMMEDA_F1    | Benchmark MOP for testing RM-MEDA                 |        | √     |      | √    |        |             | √     |             |           |            |        |            |
| 253 | RMMEDA_F2    | Benchmark MOP for testing RM-MEDA                 |        | √     |      | √    |        |             | √     |             |           |            |        |            |
| 254 | RMMEDA_F3    | Benchmark MOP for testing RM-MEDA                 |        | √     |      | √    |        |             | √     |             |           |            |        |            |

|     | Abbreviation | Full name                                               | single | multi | many | real | binary | permutation | large | constrained | expensive | multimodal | sparse | preference |
|-----|--------------|---------------------------------------------------------|--------|-------|------|------|--------|-------------|-------|-------------|-----------|------------|--------|------------|
| 255 | RMEDA_F4     | Benchmark MOP for testing RM-MEDA                       |        | √     |      | √    |        |             | √     |             |           |            |        |            |
| 256 | RMEDA_F5     | Benchmark MOP for testing RM-MEDA                       |        | √     |      | √    |        |             | √     |             |           |            |        |            |
| 257 | RMEDA_F6     | Benchmark MOP for testing RM-MEDA                       |        | √     |      | √    |        |             | √     |             |           |            |        |            |
| 258 | RMEDA_F7     | Benchmark MOP for testing RM-MEDA                       |        | √     |      | √    |        |             | √     |             |           |            |        |            |
| 259 | RMEDA_F8     | Benchmark MOP for testing RM-MEDA                       |        | √     |      | √    |        |             | √     |             |           |            |        |            |
| 260 | RMEDA_F9     | Benchmark MOP for testing RM-MEDA                       |        | √     |      | √    |        |             | √     |             |           |            |        |            |
| 261 | RMEDA_F10    | Benchmark MOP for testing RM-MEDA                       |        | √     |      | √    |        |             | √     |             |           |            |        |            |
| 262 | Sparse_CD    | The community detection problem                         |        | √     |      |      | √      |             | √     |             | √         |            | √      |            |
| 263 | Sparse_CN    | The critical node detection problem                     |        | √     |      |      | √      |             | √     |             | √         |            | √      |            |
| 264 | Sparse_FS    | The feature selection problem                           |        | √     |      |      | √      |             | √     |             | √         |            | √      |            |
| 265 | Sparse_IS    | The instance selection problem                          |        | √     |      |      | √      |             | √     |             | √         |            | √      |            |
| 266 | Sparse_KP    | The sparse multi-objective knapsack problem             |        | √     | √    |      | √      |             | √     |             |           |            |        |            |
| 267 | Sparse_NN    | The neural network training problem                     |        | √     |      | √    |        |             | √     |             | √         |            | √      |            |
| 268 | Sparse_PM    | The pattern mining problem                              |        | √     |      |      | √      |             | √     |             | √         |            | √      |            |
| 269 | Sparse_PO    | The portfolio optimization problem                      |        | √     |      | √    |        |             | √     |             | √         |            | √      |            |
| 270 | Sparse_SR    | The sparse signal reconstruction problem                |        | √     |      | √    |        |             | √     |             | √         |            | √      |            |
| 271 | SMMOP1       | Sparse multi-modal multi-objective optimization problem |        | √     | √    | √    |        |             | √     |             |           | √          | √      |            |
| 272 | SMMOP2       | Sparse multi-modal multi-objective optimization problem |        | √     | √    | √    |        |             | √     |             |           | √          | √      |            |
| 273 | SMMOP3       | Sparse multi-modal multi-objective optimization problem |        | √     | √    | √    |        |             | √     |             |           | √          | √      |            |
| 274 | SMMOP4       | Sparse multi-modal multi-objective optimization problem |        | √     | √    | √    |        |             | √     |             |           | √          | √      |            |
| 275 | SMMOP5       | Sparse multi-modal multi-objective optimization problem |        | √     | √    | √    |        |             | √     |             |           | √          | √      |            |
| 276 | SMMOP6       | Sparse multi-modal multi-objective optimization problem |        | √     | √    | √    |        |             | √     |             |           | √          | √      |            |
| 277 | SMMOP7       | Sparse multi-modal multi-objective optimization problem |        | √     | √    | √    |        |             | √     |             |           | √          | √      |            |
| 278 | SMMOP8       | Sparse multi-modal multi-objective optimization problem |        | √     | √    | √    |        |             | √     |             |           | √          | √      |            |
| 279 | SMOP1        | Benchmark MOP with sparse Pareto optimal solutions      |        | √     | √    | √    |        |             | √     |             | √         |            | √      |            |
| 280 | SMOP2        | Benchmark MOP with sparse Pareto optimal solutions      |        | √     | √    | √    |        |             | √     |             | √         |            | √      |            |
| 281 | SMOP3        | Benchmark MOP with sparse Pareto optimal solutions      |        | √     | √    | √    |        |             | √     |             | √         |            | √      |            |
| 282 | SMOP4        | Benchmark MOP with sparse Pareto optimal solutions      |        | √     | √    | √    |        |             | √     |             | √         |            | √      |            |
| 283 | SMOP5        | Benchmark MOP with sparse Pareto optimal solutions      |        | √     | √    | √    |        |             | √     |             | √         |            | √      |            |
| 284 | SMOP6        | Benchmark MOP with sparse Pareto optimal solutions      |        | √     | √    | √    |        |             | √     |             | √         |            | √      |            |
| 285 | SMOP7        | Benchmark MOP with sparse Pareto optimal solutions      |        | √     | √    | √    |        |             | √     |             | √         |            | √      |            |
| 286 | SMOP8        | Benchmark MOP with sparse Pareto optimal solutions      |        | √     | √    | √    |        |             | √     |             | √         |            | √      |            |
| 287 | SOP_F1       | Sphere function                                         | √      |       |      | √    |        |             |       |             | √         |            |        |            |
| 288 | SOP_F2       | Schwefel's function 2.22                                | √      |       |      | √    |        |             |       |             | √         |            |        |            |
| 289 | SOP_F3       | Schwefel's function 1.2                                 | √      |       |      | √    |        |             |       |             | √         |            |        |            |
| 290 | SOP_F4       | Schwefel's function 2.21                                | √      |       |      | √    |        |             |       |             | √         |            |        |            |
| 291 | SOP_F5       | Generalized Rosenbrock's function                       | √      |       |      | √    |        |             |       |             | √         |            |        |            |

|     | Abbreviation | Full name                                       | single | multi | many | real | binary | permutation | large | constrained | expensive | multimodal | sparse | preference |
|-----|--------------|-------------------------------------------------|--------|-------|------|------|--------|-------------|-------|-------------|-----------|------------|--------|------------|
| 292 | SOP_F6       | Step function                                   | √      |       |      | √    |        |             |       |             | √         |            |        |            |
| 293 | SOP_F7       | Quartic function with noise                     | √      |       |      | √    |        |             |       |             | √         |            |        |            |
| 294 | SOP_F8       | Generalized Schwefel's function 2.26            | √      |       |      | √    |        |             |       |             | √         |            |        |            |
| 295 | SOP_F9       | Generalized Rastrigin's function                | √      |       |      | √    |        |             |       |             | √         |            |        |            |
| 296 | SOP_F10      | Ackley's function                               | √      |       |      | √    |        |             |       |             | √         |            |        |            |
| 297 | SOP_F11      | Generalized Griewank's function                 | √      |       |      | √    |        |             |       |             | √         |            |        |            |
| 298 | SOP_F12      | Generalized penalized function                  | √      |       |      | √    |        |             |       |             | √         |            |        |            |
| 299 | SOP_F13      | Generalized penalized function                  | √      |       |      | √    |        |             |       |             | √         |            |        |            |
| 300 | SOP_F14      | Shekel's foxholes function                      | √      |       |      | √    |        |             |       |             | √         |            |        |            |
| 301 | SOP_F15      | Kowalik's function                              | √      |       |      | √    |        |             |       |             | √         |            |        |            |
| 302 | SOP_F16      | Six-hump camel-back function                    | √      |       |      | √    |        |             |       |             | √         |            |        |            |
| 303 | SOP_F17      | Branin function                                 | √      |       |      | √    |        |             |       |             | √         |            |        |            |
| 304 | SOP_F18      | Goldstein-price function                        | √      |       |      | √    |        |             |       |             | √         |            |        |            |
| 305 | SOP_F19      | Hartman's family                                | √      |       |      | √    |        |             |       |             | √         |            |        |            |
| 306 | SOP_F20      | Hartman's family                                | √      |       |      | √    |        |             |       |             | √         |            |        |            |
| 307 | SOP_F21      | Shekel's family                                 | √      |       |      | √    |        |             |       |             | √         |            |        |            |
| 308 | SOP_F22      | Shekel's family                                 | √      |       |      | √    |        |             |       |             | √         |            |        |            |
| 309 | SOP_F23      | Shekel's family                                 | √      |       |      | √    |        |             |       |             | √         |            |        |            |
| 310 | TREE1        | The time-varying ratio error estimation problem |        | √     |      | √    |        |             | √     | √           | √         |            |        |            |
| 311 | TREE2        | The time-varying ratio error estimation problem |        | √     |      | √    |        |             | √     | √           | √         |            |        |            |
| 312 | TREE3        | The time-varying ratio error estimation problem |        | √     |      | √    |        |             | √     | √           | √         |            |        |            |
| 313 | TREE4        | The time-varying ratio error estimation problem |        | √     |      | √    |        |             | √     | √           | √         |            |        |            |
| 314 | TREE5        | The time-varying ratio error estimation problem |        | √     |      | √    |        |             | √     | √           | √         |            |        |            |
| 315 | TREE6        | The time-varying ratio error estimation problem |        | √     |      | √    |        |             | √     | √           | √         |            |        |            |
| 316 | TSP          | The traveling salesman problem                  | √      |       |      |      |        | √           | √     |             |           |            |        |            |
| 317 | UF1          | Unconstrained benchmark MOP                     |        | √     |      | √    |        |             | √     |             |           |            |        |            |
| 318 | UF2          | Unconstrained benchmark MOP                     |        | √     |      | √    |        |             | √     |             |           |            |        |            |
| 319 | UF3          | Unconstrained benchmark MOP                     |        | √     |      | √    |        |             | √     |             |           |            |        |            |
| 320 | UF4          | Unconstrained benchmark MOP                     |        | √     |      | √    |        |             | √     |             |           |            |        |            |
| 321 | UF5          | Unconstrained benchmark MOP                     |        | √     |      | √    |        |             | √     |             |           |            |        |            |
| 322 | UF6          | Unconstrained benchmark MOP                     |        | √     |      | √    |        |             | √     |             |           |            |        |            |
| 323 | UF7          | Unconstrained benchmark MOP                     |        | √     |      | √    |        |             | √     |             |           |            |        |            |
| 324 | UF8          | Unconstrained benchmark MOP                     |        | √     |      | √    |        |             | √     |             |           |            |        |            |
| 325 | UF9          | Unconstrained benchmark MOP                     |        | √     |      | √    |        |             | √     |             |           |            |        |            |
| 326 | UF10         | Unconstrained benchmark MOP                     |        | √     |      | √    |        |             | √     |             |           |            |        |            |
| 327 | VNT1         | Benchmark MOP proposed by Viennet               |        | √     |      | √    |        |             |       |             |           |            |        |            |
| 328 | VNT2         | Benchmark MOP proposed by Viennet               |        | √     |      | √    |        |             |       |             |           |            |        |            |

|     | Abbreviation | Full name                                          | single | multi | many | real | binary | permutation | large | constrained | expensive | multimodal | sparse | preference |
|-----|--------------|----------------------------------------------------|--------|-------|------|------|--------|-------------|-------|-------------|-----------|------------|--------|------------|
| 329 | VNT3         | Benchmark MOP proposed by Viennet                  |        | √     |      | √    |        |             |       |             |           |            |        |            |
| 330 | VNT4         | Benchmark MOP proposed by Viennet                  |        | √     |      | √    |        |             |       | √           |           |            |        |            |
| 331 | WFG1         | Benchmark MOP proposed by Walking Fish Group       |        | √     | √    | √    |        |             | √     |             | √         |            |        |            |
| 332 | WFG2         | Benchmark MOP proposed by Walking Fish Group       |        | √     | √    | √    |        |             | √     |             | √         |            |        |            |
| 333 | WFG3         | Benchmark MOP proposed by Walking Fish Group       |        | √     | √    | √    |        |             | √     |             | √         |            |        |            |
| 334 | WFG4         | Benchmark MOP proposed by Walking Fish Group       |        | √     | √    | √    |        |             | √     |             | √         |            |        |            |
| 335 | WFG5         | Benchmark MOP proposed by Walking Fish Group       |        | √     | √    | √    |        |             | √     |             | √         |            |        |            |
| 336 | WFG6         | Benchmark MOP proposed by Walking Fish Group       |        | √     | √    | √    |        |             | √     |             | √         |            |        |            |
| 337 | WFG7         | Benchmark MOP proposed by Walking Fish Group       |        | √     | √    | √    |        |             | √     |             | √         |            |        |            |
| 338 | WFG8         | Benchmark MOP proposed by Walking Fish Group       |        | √     | √    | √    |        |             | √     |             | √         |            |        |            |
| 339 | WFG9         | Benchmark MOP proposed by Walking Fish Group       |        | √     | √    | √    |        |             | √     |             | √         |            |        |            |
| 340 | ZDT1         | Benchmark MOP proposed by Zitzler, Deb, and Thiele |        | √     |      | √    |        |             | √     |             | √         |            |        |            |
| 341 | ZDT2         | Benchmark MOP proposed by Zitzler, Deb, and Thiele |        | √     |      | √    |        |             | √     |             | √         |            |        |            |
| 342 | ZDT3         | Benchmark MOP proposed by Zitzler, Deb, and Thiele |        | √     |      | √    |        |             | √     |             | √         |            |        |            |
| 343 | ZDT4         | Benchmark MOP proposed by Zitzler, Deb, and Thiele |        | √     |      | √    |        |             | √     |             | √         |            |        |            |
| 344 | ZDT5         | Benchmark MOP proposed by Zitzler, Deb, and Thiele |        | √     |      |      | √      |             | √     |             | √         |            |        |            |
| 345 | ZDT6         | Benchmark MOP proposed by Zitzler, Deb, and Thiele |        | √     |      | √    |        |             | √     |             | √         |            |        |            |
